1 Conformations of the Human Immunodeficiency Virus (HIV-1) Envelope Glycoproteins  
2 in Detergents and Styrene-Maleic Acid Lipid Particles (SMALPs)

3  
4 Rong Zhou<sup>1,2,6#</sup>, Shijian Zhang<sup>1,2#\*</sup>, Hanh T. Nguyen<sup>1,2</sup>, Haitao Ding<sup>3,4</sup>, Althea Gaffney<sup>5</sup>,  
5 John C. Kappes<sup>3,4</sup>, Amos B. Smith III<sup>5</sup>, Joseph G. Sodroski<sup>1,2\*</sup>  
6

7 <sup>1</sup>Department of Cancer Immunology and Virology, Dana-Farber Cancer Institute,  
8 Boston, MA 02215, USA  
9

10 <sup>2</sup>Department of Microbiology, Harvard Medical School, Boston, MA 02115, USA  
11

12 <sup>3</sup>Department of Medicine, University of Alabama at Birmingham, AL 35294, USA  
13

14 <sup>4</sup>Birmingham Veterans Affairs Medical Center, Research Service, Birmingham, AL  
15 35294, USA  
16

17 <sup>5</sup>Department of Chemistry, University of Pennsylvania, Philadelphia, PA 19104, USA  
18

19 <sup>6</sup>Current affiliation: Department of Cardiology, The Second Affiliated Hospital of Shanxi  
20 Medical University, Taiyuan, Shanxi, China  
21

22 #These authors contributed equally  
23  
24  
25

26 \*Corresponding authors:

27 Shijian Zhang, Ph.D.

28 Joseph G. Sodroski, M.D.

29 Dana-Farber Cancer Institute

30 450 Brookline Avenue, CLS 1010

31 Boston, MA 02215

32 Phone: 617-632-3371 Fax: 617-632-4338

33 Email: [shijian\\_zhang@dfci.harvard.edu](mailto:shijian_zhang@dfci.harvard.edu), [joseph\\_sodroski@dfci.harvard.edu](mailto:joseph_sodroski@dfci.harvard.edu)  
34

35 Running title: HIV Env conformations in detergents or SMALP nanodiscs  
36

37 Abstract word count: 249  
38

39 Importance word count: 149  
40

41 **ABSTRACT**

42 The mature human immunodeficiency virus (HIV-1) envelope glycoprotein (Env) trimer,  
43 which consists of non-covalently associated gp120 exterior and gp41 transmembrane  
44 subunits, mediates virus entry into cells. The pretriggered (State-1) Env conformation is  
45 the major target for broadly neutralizing antibodies (bNAbs), whereas receptor-induced  
46 downstream Env conformations elicit immunodominant, poorly neutralizing antibody  
47 (pNAb) responses. To examine the contribution of membrane anchorage to the  
48 maintenance of the metastable pretriggered Env conformation, we compared wild-type  
49 and State-1-stabilized Envs solubilized in detergents or in styrene-maleic acid (SMA)  
50 copolymers. SMA directly incorporates membrane lipids and resident membrane  
51 proteins into lipid nanodiscs (SMALPs). The integrity of the Env trimer in SMALPs was  
52 maintained at both 4°C and room temperature. By contrast, Envs solubilized in Cymal-5,  
53 a non-ionic detergent, were unstable at room temperature, although their stability was  
54 improved at 4°C and after incubation with the entry inhibitor BMS-806. Envs solubilized  
55 in ionic detergents were relatively unstable at either temperature. Comparison of Envs  
56 solubilized in Cymal-5 and SMA at 4°C revealed subtle differences in bNAb binding to  
57 the gp41 membrane-proximal external region (MPER), consistent with these distinct  
58 modes of Env solubilization. Otherwise, the antigenicity of the Cymal-5- and SMA-  
59 solubilized Envs was remarkably similar, both in the absence and presence of BMS-  
60 806. However, both solubilized Envs were recognized differently from the mature  
61 membrane Env by specific bNAbs and pNAbs. Thus, detergent-based and detergent-  
62 free solubilization at 4°C alters the pretriggered membrane Env conformation in

63 consistent ways, indicating that loss of Env association with the membrane results in  
64 default state(s).

65

66

## 67 **IMPORTANCE**

68 The human immunodeficiency virus (HIV-1) envelope glycoproteins (Envs) in the viral  
69 membrane mediate virus entry into the host cell and are targeted by neutralizing  
70 antibodies elicited by natural infection or vaccines. Detailed studies of membrane  
71 proteins rely on purification procedures that allow the proteins to maintain their natural  
72 conformation. In this study, we show that a styrene-maleic acid (SMA) copolymer can  
73 extract HIV-1 Env from a membrane without the use of detergents. The Env in SMA is  
74 more stable at room temperature than Env in detergents. The purified Env in SMA  
75 maintains many but not all of the characteristics expected of the natural membrane Env.  
76 Our results underscore the importance of the membrane environment to the native  
77 conformation of HIV-1 Env. Purification methods that bypass the need for detergents  
78 could be useful tools for future studies of HIV-1 Env structure and its interaction with  
79 receptors and antibodies.

80

## 81 **KEYWORDS**

82 Virus, membrane, Env, solubilization, Cymal-5, DIBMA, SMA, default conformation,  
83 structure, detergent

84

85

## 86 **INTRODUCTION**

87 Human immunodeficiency virus (HIV-1) entry is mediated by the envelope glycoprotein  
88 (Env) trimer, a Class I viral fusion protein composed of three gp120 exterior subunits  
89 and three gp41 transmembrane subunits (1-3). In HIV-1 infected cells, Env is  
90 synthesized in the endoplasmic reticulum as an ~856-amino acid precursor that  
91 trimerizes and undergoes signal peptide cleavage and the addition of high-mannose  
92 glycans (4-7). In the Golgi compartment, the gp160 Env precursor is cleaved by host  
93 furin-like proteases into the gp120 and gp41 subunits and is further modified by the  
94 addition of complex carbohydrates (8-12). These mature Envs are selectively  
95 incorporated into virions (8).

96

97         Single-molecule fluorescence resonance energy transfer (smFRET) experiments  
98 indicate that, on virus particles, the Env trimer exists in three conformational states  
99 (States 1 to 3) (13). The metastable pretriggered Env conformation (State 1)  
100 predominates on virions from primary HIV-1 strains; upon interaction with the receptors,  
101 CD4 and CCR5 or CXCR4, Env undergoes transitions to lower-energy states (States 2  
102 and 3) (13-15). Receptor-induced transitions in gp41 result in the interaction of the N-  
103 terminal fusion peptide with the target cell membrane and in the formation of a six-helix  
104 bundle that drives the fusion of viral and cell membranes (16-24).

105

106         In natural HIV-1 infection, Env strain variability, heavy glycosylation and  
107 conformational flexibility contribute to HIV-1 persistence by diminishing the binding and  
108 elicitation of neutralizing antibodies (25-29). The gp160 Env precursor, which samples

109 multiple conformations, and disassembled Envs (shed gp120, gp41 six-helix bundles)  
110 elicit high titers of poorly neutralizing antibodies (pNAbs) that fail to recognize the  
111 mature pretriggered (State-1) Env trimer (30-35). After years of infection, a minority of  
112 HIV-1-infected individuals generate broadly neutralizing antibodies (bNAbs), most of  
113 which recognize the cleaved pretriggered (State-1) Env conformation (13, 36-43). Six  
114 categories of bNAbs that target different Env epitopes have been identified (Table 1)  
115 (27,29,44,45). Although passively administered monoclonal bNAbs are protective in  
116 animal models of HIV-1 infection (46-49), suggesting their potential utility in prophylaxis,  
117 bNAbs have not been efficiently and consistently elicited by current vaccine candidates  
118 (50-54).

119

120 Differences in the antigenicity, glycosylation and conformation of soluble Env  
121 trimers used as immunogens and the pretriggered (State-1) membrane Env have been  
122 observed (12,55-59). Given the requirement for bNAbs to recognize conserved,  
123 conformation-specific and often glycan-dependent elements on the pretriggered (State-  
124 1) Env (13,36-43), even small differences from the native State-1 Env might affect  
125 immunogen efficacy. Both the conformation and the glycan composition of the State-1  
126 Env depend upon association with the membrane (12,57,60-65). These considerations  
127 recommend the need to study HIV-1 Envs in native membrane environments.

128

129 In preparation for their biochemical, biophysical and structural characterization,  
130 membrane proteins are often solubilized in detergents to allow purification. In some  
131 cases, the purified proteins can be reconstituted into a phospholipid membrane

132 environment such as proteoliposomes or nanodiscs (66,67). For metastable membrane  
133 proteins such as HIV-1 Env, detergent solubilization could lead to irreversible effects on  
134 conformation. Indeed, Env conformations resembling State 2, which has been  
135 suggested to represent a default conformation (68,69), have been observed for  
136 detergent-solubilized HIV-1 Envs, including those reconstituted into proteoliposomes or  
137 nanodiscs (58,70-73). To allow membrane protein purification and characterization  
138 while bypassing completely the need for detergent solubilization, styrene-maleic acid  
139 (SMA) copolymers have been developed that directly solubilize lipid membranes and  
140 resident membrane proteins into 9-15-nm discoidal nanoparticles (SMA lipid particles or  
141 SMALPs) (74-80). In some cases, membrane proteins in SMALPs have been shown to  
142 be thermostable compared to the detergent-solubilized proteins (80,81). The cryo-  
143 electron microscopy (cryo-EM) structure of the multidrug exporter AcrB in SMALPs  
144 revealed a remarkably well-ordered lipid bilayer associated with the transmembrane  
145 domains of the protein (82). Here, we compare the stability and antigenicity of HIV-1  
146 Envs solubilized using SMA versus detergents (Cymal-5 or SDS/deoxycholate). Such  
147 studies provide insights into the important contribution of protein-membrane interactions  
148 to the maintenance of a native Env conformation.

149

## 150 **RESULTS**

151 **Antigenicity of a State-1-stabilized HIV-1<sub>AD8</sub> Env variant on the surface of**  
152 **expressing cells.** A previous study described HIV-1<sub>AD8</sub> Env mutants with increased  
153 State-1 stability, improved precursor cleavage, and a higher content of lysine residues  
154 potentially useful for crosslinking (83). One of these HIV-1<sub>AD8</sub> variants, 2-4 RM6 E, will

155 be used throughout this study and, in some cases, will be compared with the wild-type  
156 (wt) HIV-1<sub>AD8</sub> Env (see Material and Methods for a more detailed description of these  
157 Envs). To provide a standard for the antigenicity of a native, State-1-enriched  
158 membrane Env, we evaluated the recognition of cleaved and uncleaved 2-4 RM6 E Env  
159 on the surface of expressing A549 cells by panels of pNAbs and bNAbs (Fig. 1, Table  
160 1). As expected (43, 71), the pNAbs preferentially recognized the 2-4 RM6 E gp160 Env  
161 but not the cleaved gp120 and gp41 Envs. By contrast, the bNAbs precipitated the  
162 cleaved gp120 and gp41 Envs, indicating their ability to bind the mature Env trimer on  
163 the cell surface. The antigenicity profile of the cell-surface 2-4 RM6 E Env is similar to  
164 that previously reported for the wt HIV-1<sub>AD8</sub> Env (43).

165

166 **Antigenicity of wt and 2-4 RM6 E Envs in a cell membrane preparation.** Preparation  
167 of cell membranes is often used as an initial step in the purification of membrane  
168 proteins, as cell nuclei, mitochondria and cytosolic proteins are removed. To evaluate  
169 the potential effect of membrane preparation on Env conformation, we examined the  
170 antigenicity of the wt HIV-1<sub>AD8</sub> and the 2-4 RM6 E Envs in membranes purified from  
171 expressing A549 cells (Fig. 2). We evaluated membrane Env antigenicity in the absence  
172 and presence of BMS-806, a small-molecule HIV-1 entry inhibitor that decreases Env  
173 transitions from State 1 and thereby stabilizes the pretriggered conformation  
174 (13,43,59,84-86). Briefly, after incubation with a panel of pNAbs and bNAbs, the purified  
175 cell membranes were lysed in an NP-40 buffer and the Env-antibody complexes were  
176 captured on Protein A-Sepharose beads and analyzed by Western blotting. The 2-4  
177 RM6 E Env was proteolytically processed more efficiently than the wt HIV-1<sub>AD8</sub> Env, as

178 expected (83), resulting in a relative increase in the cleaved 2-4 RM6 E Env in the Input  
179 samples (Fig. 2A). Most pNAbs efficiently recognized the wt and 2-4 RM6 E gp160  
180 Envs. The addition of BMS-806 slightly reduced gp160 binding by the F105 pNAb  
181 against the CD4 binding site and the 17b pNAb against a CD4-induced (CD4i) gp120  
182 epitope; both epitopes are near the BMS-806 binding site (87). Recognition of the  
183 cleaved Envs by the pNAbs was generally inefficient; however, the 19b anti-V3 pNAb  
184 and to a lesser extent the 17b CD4i pNAb recognized the wt and 2-4 RM6 E gp120  
185 glycoproteins. This binding of the 19b and 17b pNAbs to gp120 was inhibited by BMS-  
186 806; moreover, when normalized to the Input gp120, the recognition of the 2-4 RM6 E  
187 gp120 by the 19b and 17b pNAbs was reduced compared with that of the wt HIV-1<sub>AD8</sub>  
188 Env (Fig. 2B, left panels). These observations suggest that the exposure of V3 and  
189 CD4i epitopes may result from the spontaneous sampling of more open State 2/3-like  
190 conformations by the Envs on the purified cell membranes. Spontaneous exposure of  
191 gp120 V3 and CD4i epitopes on intact HIV-1<sub>AD8</sub> virions has recently been observed (88)  
192 and is consistent with the conformational flexibility of virion Envs documented by  
193 smFRET studies (13,59,85). Two representative bNAbs, PGT121 against a V3-glycan  
194 epitope and PGT145 against the trimer apex, recognized the cleaved wt and 2-4 RM6 E  
195 Envs efficiently in the absence or presence of BMS-806. Thus, the antibody binding  
196 profiles of the wt HIV-1<sub>AD8</sub> and 2-4 RM6 E Envs in the purified membranes correspond  
197 to those observed for these Envs on the cell and viral surfaces (Fig.1 and references 43  
198 and 88).  
199



200 **Comparison of the ability of different amphipathic copolymers to extract HIV-1**

201 **Env from membranes.** Although SMALPs have proven to be of great utility for  
202 membrane protein solubilization and characterization (74-82), they do have limitations.  
203 SMALPs need to be maintained at low concentrations of divalent cations and at pH  
204 values above 7.5 to remain in solution (77,80). Likely due to the aromatic styrene  
205 groups in the SMA copolymer, SMALPs absorb ultraviolet light, interfering with protein  
206 concentration measurements at 280 nm (77). Efforts have been made to overcome  
207 these limitations by replacing maleic acid with other hydrophilic moieties (e.g., glycerol,  
208 glucosamine) or supplanting styrene with diisobutylene (Fig. 3) (89,90).

209

210 We compared commercially available preparations of SMA and diisobutylene-  
211 maleic acid (DIBMA) variants with an in-house preparation of SMA (see Materials and  
212 Methods). The efficiency with which these amphipathic copolymers extracted a  
213 crosslinked, State-1-stabilized Env, AE.2, from cell membranes was compared. The  
214 AE.2 Env is closely related to the 2-4 RM6 E Env, but has one additional State-1-  
215 stabilizing change and one additional lysine substitution for potential crosslinking (see  
216 Materials and Methods) (83). Cell membranes prepared from A549 cells expressing the  
217 His<sub>6</sub>-tagged AE.2 Env were crosslinked with DTSSP. The crosslinked membrane was  
218 divided into equal parts, which were used for the extraction of Env by the different  
219 amphipathic copolymers. The solubilized Envs were purified on Ni-NTA beads and  
220 subjected to SDS-PAGE and silver staining (Fig. 4A). The highest yield of Env was  
221 obtained with our in-house SMA, with slightly lower Env yields obtained with DIBMA 10,  
222 DIBMA 12 and SMA 11001. The SMA 11001, which unlike the other SMA variants has a

223 dimethylaminopropylamine (DMAPA) group, extracted a higher proportion of uncleaved  
224 gp160 and crosslinked gp120-gp41 Env than the other SMA copolymers. These results  
225 indicate that the ratio and the nature of the hydrophobic and polar groups in the  
226 copolymer can influence the yield and maturity of the extracted Envs.

227

228         We next examined the antigenic profiles of the crosslinked and purified AE.2  
229 Envs extracted with the different amphipathic copolymers. The ability of four bNAbs  
230 (2G12, PGT145, PG9 and VRC03) and the 19b pNAb to recognize the solubilized AE.2  
231 Envs was evaluated. PGT145, PG9 and VRC03 exhibit some preference for State-1  
232 Envs; 2G12 recognizes gp120 outer domain glycans in a manner that is less dependent  
233 on the Env conformational state (13,43,68,69). Also, PGT145 and PG9 preferentially  
234 recognize cleaved Envs (13,68,69,91). Differences in the yield of Env influenced the  
235 amounts of Env precipitated by the antibodies (Fig. 4B). For the instances where bNAb  
236 recognition was detectable, the overall pattern of bNAb recognition was similar for all  
237 copolymers. The 2G12 bNAb recognized most of the solubilized Envs in proportion to  
238 the yields. On the other hand, recognition of the purified AE.2 Envs by the State-1  
239 preferring bNAbs was relatively weak, indicating that the pretriggered Env conformation  
240 was only inefficiently preserved in the amphipathic copolymer complexes. With the  
241 exception of the uncleaved AE.2 Env extracted by SMALP 11001, the purified AE.2  
242 Envs were inefficiently recognized by the 19b pNAb. As the yield of antigenically similar,  
243 cleaved Env trimers extracted by our in-house SMA was at least as good as that of any  
244 of the other copolymers, we used our in-house SMA for the following studies.

245

246 **Stability of solubilized Env trimers at different temperatures.** Some membrane  
247 proteins in SMALPs or DIBMA nanodiscs have been suggested to be more stable than  
248 when solubilized in detergents (79,81,82,92-94). We compared the stability of the wt  
249 HIV-1<sub>AD8</sub> and 2-4 RM6 E Env trimers solubilized in Cymal-5 (a nonionic detergent), SMA  
250 and RIPA buffer (which contains two ionic detergents, SDS and deoxycholate). Both  
251 Envs were extracted from expressing cells slightly more efficiently by Cymal-5 and RIPA  
252 than by SMA (see Input in Fig. 5A). To evaluate the stability of the solubilized Envs, we  
253 took advantage of the His<sub>6</sub> tag at the gp41 C-terminus, which allows the Envs to be  
254 precipitated using Ni-NTA beads. The ratio of the gp120:gp160 Envs in the precipitated  
255 samples provides an indication of the stability of the Env trimer in solution (43). In this  
256 manner, Env trimer stability was measured at either 4°C or room temperature for 1 and  
257 16 h (Fig. 5A and B). Under all conditions tested, the wt and 2-4 RM6 E Envs were less  
258 stable in RIPA buffer than in Cymal-5 or SMA. The addition of BMS-806 during the  
259 solubilization only minimally improved the stability of the Envs in RIPA buffer; the  
260 positive effect of BMS-806 on RIPA-solubilized Envs was observed only during the 1-h  
261 experiment at 4°C. Apparently, the instability of the RIPA-solubilized Env trimers at  
262 room temperature or for longer incubation periods precluded the possibility of detecting  
263 a stabilizing effect of BMS-806.

264

265 The wt and 2-4 RM6 E Envs solubilized in SMA or Cymal-5 exhibited comparable  
266 stability during a 1-h incubation at 4°C in the absence of BMS-806; the stability of both  
267 Envs solubilized in Cymal-5 but not in SMA was enhanced by BMS-806 during a long  
268 (16-h) incubation at 4°C. Notably, at room temperature in the absence of BMS-806, both

269 the wt and 2-4 RM6 E Envs in SMALPs were more stable than these Envs in Cymal-5  
270 or RIPA buffer. The addition of BMS-806 did not significantly increase the stability of  
271 Envs in SMALPs at either temperature. Blue Native gel analysis revealed that at room  
272 temperature, the 2-4 RM6 E Env in SMALPs largely comprises higher-order oligomers  
273 consistent with trimers, whereas a substantial fraction of the 2-4 RM6 E Env in Cymal-5  
274 consists of lower-molecular-weight forms (Fig. 6). Thus, compared with detergent-  
275 solubilized Envs, Envs in SMALPs maintained better trimer integrity during room  
276 temperature incubation.

277

278 **Antibody binding profile of the 2-4 RM6 E Env in Cymal-5 or SMALPs.** The above  
279 observations indicate that solubilization in SMA and detergents can exert different  
280 effects on the stability of the Env trimers, raising the possibility that solubilization could  
281 influence Env antigenicity. To examine this possibility, lysates of A549 cells expressing  
282 the 2-4 RM6 E Env were prepared using 1% Cymal-5 or 1% SMA. Initially, we  
283 attempted to precipitate the solubilized Env from these cell lysates, but found that the  
284 presence of uncomplexed SMA in the lysates non-specifically interfered with  
285 immunoprecipitation by all antibodies tested (data not shown). This problem was  
286 remedied by partially purifying the 2-4 RM6 E Env in the cell lysates using Ni-NTA  
287 beads. After eluting the 2-4 RM6 E Env from the Ni-NTA beads, the antigenicity of the  
288 solubilized Env was evaluated by immunoprecipitation by a panel of pNAbs and bNAbs  
289 (Fig. 7A and B). In parallel experiments, BMS-806 was added to the cells prior to lysis  
290 and maintained in the cell lysates during the initial stage of immunoprecipitation.

291

292 In the absence of BMS-806, the cleaved 2-4 RM6 E Env in Cymal-5 was  
293 precipitated by all the bNAbs, although relatively weakly by the PGT145, PG16 and  
294 VRC03 bNAbs. Precipitation of the cleaved 2-4 RM6 E Env in SMALPs by bNAbs was  
295 generally weaker than that seen in Cymal-5, but showed a qualitatively similar pattern.  
296 Both Cymal-5- and SMA-solubilized cleaved 2-4 RM6 E Envs were recognized by the  
297 19b and F105 pNAbs and, for the SMA-solubilized Envs, by the 17b pNAb as well. Both  
298 solubilized Envs contained populations that apparently shed gp120 and were  
299 precipitated by the F240 pNAb, which recognizes a Cluster I epitope on the gp41  
300 ectodomain (95). These observations indicate that the conformations of both Cymal-5-  
301 and SMA-solubilized cleaved 2-4 RM6 E Envs differ from that of the cleaved cell-  
302 surface or membrane 2-4 RM6 E Env. In particular, the conformational differences  
303 between the solubilized cleaved Envs and the membrane cleaved Env are manifest in  
304 weaker recognition of the former Envs by the State-1-preferring PGT145, PG9 and  
305 VRC03 bNAbs and stronger recognition by V3, CD4BS and CD4i pNAbs. Thus, without  
306 BMS-806, the 2-4 RM6 E Env in Cymal-5 micelles or SMALPs readily samples  
307 conformations other than State 1.

308  
309 It is noteworthy that in the absence of BMS-806, the antigenic profiles of the  
310 cleaved 2-4 RM6 E Envs solubilized in Cymal-5- and SMA are well correlated (Fig. 8A).  
311 The most significant differences between these solubilized Envs relate to recognition by  
312 the 4E10 and 10E8 bNAbs against the membrane-proximal external region (MPER) of  
313 gp41 (Fig. 8A); such differences may result from local changes in MPER structure  
314 associated with the distinct modes of Env solubilization employed by Cymal-5 and SMA.

315 Recognition of other epitopes on the Cymal-5- and SMA-solubilized Envs was strongly  
316 correlated (Fig. 8B). Thus, in the absence of BMS-806 or other ligands, different means  
317 of solubilizing the 2-4 RM6 E Env result in similar conformational states.

318

319 The addition of BMS-806 changed the antigenic profile of the cleaved 2-4 RM6 E  
320 Env in Cymal-5 and SMALPs (Fig. 7A and B). Recognition of the cleaved 2-4 RM6 E  
321 Env by the PG16, PGT151 and 35O22 bNAbs (and by the PGT145 bNAb in the case of  
322 SMA) was increased in the presence of BMS-806. Recognition of the cleaved Env in  
323 Cymal-5 and SMALPs by the 19b, F105, 17b and F240 pNAbs was decreased by BMS-  
324 806. Thus, both forms of solubilized Env demonstrated an antigenic profile closer to that  
325 of the cell-surface Env when BMS-806 was present. Nonetheless, the relatively weak  
326 binding of the PGT145 and VRC03 bNAbs and the residual binding of the 19b and F105  
327 pNAbs to the cleaved 2-4 RM6 E Env in Cymal-5 and SMALPs indicate conformational  
328 differences from the mature membrane Env. Similar to our observation in the absence  
329 of BMS-806 (Fig. 8A), we observed that the antigenic profiles of the Cymal-5- and SMA-  
330 solubilized 2-4 RM6 E Envs correlated in the presence of BMS-806 (Fig. 8C).

331 Apparently, distinct modalities that extract Env from its membrane environment  
332 generate BMS-806-bound Envs in similar, non-State-1 conformations.

333

334 As expected (33,43,71), the uncleaved gp160 forms of both Cymal-5 and SMA-  
335 solubilized 2-4 RM6 E Envs were recognized efficiently by the pNAbs.

336

337 **Effect of crosslinking on the antigenicity of Env in SMALPs.** The above study  
338 suggests that the 2-4 RM6 E Env in SMALPs samples conformations different from  
339 those associated with the membrane Env. Crosslinking has been shown to reduce  
340 HIV-1 Env conformational flexibility, decreasing the exposure of pNAb epitopes  
341 (33,37,71,88,96). We hypothesized that crosslinking the HIV-1 Env in the presence of  
342 BMS-806 prior to extraction from the membrane would help to preserve a pretriggered  
343 (State-1) conformation after solubilization in SMA. As the 2-4 RM6 E Env is lysine-rich  
344 (83), we chose the lysine-specific crosslinker, DTSSP. DTSSP crosslinks are able to be  
345 reduced, allowing crosslinked gp120 and gp41 subunits to be distinguished from  
346 uncleaved gp160 on Western blots. Membranes prepared from A549 cells expressing  
347 the 2-4 RM6 E Env were crosslinked with DTSSP in the presence of BMS-806. BMS-  
348 806-treated control membranes were mock treated without crosslinker in parallel. The  
349 membranes were solubilized with SMA and the 2-4 RM6 E Env was purified on Ni-NTA  
350 beads. After elution of Env, the binding of antibodies was studied by  
351 immunoprecipitation, as described above.

352

353 DTSSP crosslinking of the 2-4 RM6 E Env reduced recognition of the cleaved  
354 Env by the 19b anti-V3 pNAb, and decreased binding of the 19b and F240 pNAbs to the  
355 uncleaved gp160 Env (Fig. 9). The binding of bNAbs to the cleaved 2-4 RM6 E Env was  
356 not significantly affected by DTSSP treatment. The relatively inefficient recognition of  
357 the 2-4 RM6 E Env in SMALPs by the PGT145 and VRC03 bNAbs was not improved by  
358 DTSSP crosslinking prior to solubilization. These observations suggest that crosslinking  
359 may be useful in reducing the exposure of some pNAb epitopes that accompanies Env

360 solubilization in SMA. However, crosslinking did not prevent the Env conformational  
361 changes associated with extraction into SMALPs that diminish recognition by the State-  
362 1-preferring PGT145 and VRC03 bNAbs.

363

364 **Effect of pNAb counterselection on 2-4 RM6 E Env antigenicity.** As the uncleaved  
365 Env is conformationally flexible and not functional (8,33-35,43,71), its removal from  
366 HIV-1 Env preparations would be desirable. The 19b V3-directed pNAb and the F240  
367 pNAb against the gp41 ectodomain efficiently recognized the uncleaved Env (Fig. 10A).  
368 We tested whether the uncleaved gp160 Env could be preferentially removed from the  
369 2-4 RM6 E Env preparation by counterselection with these pNAbs (97). Membranes  
370 from BMS-806-treated 2-4 RM6 E Env-expressing cells were crosslinked with DTSSP  
371 and used for the preparation of Env-SMALPs. After purification on Ni-NTA beads, the  
372 eluted Env-SMALPs were incubated with 19b and F240 pNAbs and Protein A-  
373 Sepharose beads. The antigenic profile of the 19b/F240-counterselected 2-4 RM6 E  
374 Env was evaluated as described above. Counterselection with the 19b and F240 pNAbs  
375 reduced the relative ratio of gp160:gp120 in the preparation (compare Input samples in  
376 Fig. 10A and B). The counterselected cleaved 2-4 RM6 E Env preparation was  
377 recognized by most of the bNAbs, except for the PGT145 bNAb against the V2  
378 quaternary epitope at the trimer apex and the VRC03 CD4BS antibody (Fig. 10B). The  
379 recognition of the uncleaved gp160 by pNAbs was very inefficient following 19b/F240  
380 counterselection. These results indicate that pNAb counterselection of BMS-  
381 806/DTSSP-treated Env-SMALPs can enrich the cleaved Env, which remains  
382 accessible to most bNAbs and less accessible to pNAbs.



383

## 384 **DISCUSSION**

385 The metastability of the pretriggered (State-1) Env conformation, which is of great  
386 interest as a target for small-molecule virus entry inhibitors and vaccine-elicited  
387 antibodies, creates challenges for its purification and characterization. The cleaved Env  
388 in cell membranes exhibits an antigenic profile that strongly correlates with HIV-1  
389 sensitivity to neutralization (43,71). This observation suggests that the cleaved cell  
390 membrane Env closely approximates the functional pretriggered (State-1) Env  
391 conformation on the virion. In this study, we take several approaches to address the  
392 challenges for HIV-1 Env purification created by the requirement that Env must be  
393 extracted from its native membrane environment. Several studies characterizing  
394 phenotypes of HIV-1 Envs with alterations in the membrane-proximal external region  
395 (MPER) of gp41 have suggested a dependence of the State-1 conformation on Env  
396 association with the membrane (60-65). We evaluated the consequences of extracting  
397 HIV-1 Env from membranes on the level of cleavage, trimer integrity and antigenicity. In  
398 solubilizing Env, we took measures that, in the case of other integral membrane  
399 proteins, minimize conformational disruption (74-81,89,90,92,93). In addition to using a  
400 lysine-rich, State-1-stabilized Env variant treated with BMS-806 and a crosslinker, we  
401 explored the use of amphipathic copolymers that bypass the need for detergents,  
402 solubilizing membrane proteins directly in nanodiscs.

403

404 SMA efficiently extracted HIV-1 Env from cell membranes. The stability of Env  
405 trimers in SMALPs, particularly at room temperature, was superior to that in Cymal-5 or

406 SDS/deoxycholate. Even without the State-1-stabilizing entry inhibitor, BMS-806, HIV-1  
407 Env-SMALPs maintained subunit association for over 16 hours at room temperature.  
408 The stability of these amphipathic copolymer-Env complexes may be useful in the  
409 establishment of cell-free models of Env function or in tests of Env immunogenicity.

410

411 Our antigenicity analyses revealed differences between the 2-4 RM6 E Env in  
412 cell membranes and the Envs solubilized in SMA or Cymal-5. In the absence of BMS-  
413 806, V3, CD4BS and CD4i pNAb epitopes are exposed in the Env-SMALPs and in  
414 Cymal-5-solubilized Env, indicating sampling of non-State-1 conformations. Without  
415 BMS-806, recognition of the quaternary V2 epitope at the trimer apex by PGT145 and  
416 the VRC03 CD4BS epitope was relatively inefficient for the Cymal-5-solubilized Env and  
417 Env-SMALPs. As the PGT145 and VRC03 bNAbs demonstrate some preference for the  
418 functional State-1 conformation (68,69), weak recognition of these solubilized Envs is  
419 consistent with disruption of the State-1 conformation. The conformational effects  
420 associated with extraction of the 2-4 RM6 E Env from membranes could be partially but  
421 not completely mitigated by pre-treatment of the membrane Env with BMS-806 and a  
422 crosslinker. Treatment of the membrane 2-4 RM6 E Env with BMS-806 and DTSSP  
423 decreased the exposure of pNAb epitopes in the Env-SMALPs and enhanced  
424 recognition by some, but not all, bNAbs. In particular, PGT145 and VRC03 binding was  
425 still weak, suggesting that the 2-4 RM6 E Env in the BMS-806/DTSSP-treated Env-  
426 SMALPs assumes a conformation that resembles, but is still distinct from, State 1.

427

428           What conformations are assumed by the solubilized Envs in Cymal-5 micelles or  
429 SMALPs? Subtle differences between these solubilized Env complexes were detected  
430 in the gp41 MPER. The 4E10 and 10E8 bNAbs against the gp41 MPER recognized the  
431 Cymal-5-solubilized 2-4 RM6 E Env more efficiently than the SMA-solubilized Env, in  
432 the absence of BMS-806. Differential recognition by these antibodies presumably  
433 reflects structural differences in the MPER associated with these distinct methods of  
434 Env solubilization. Other than these differences in recognition by MPER-directed  
435 bNAbs, the antigenicity of the Cymal-5-solubilized and SMA-solubilized 2-4 RM6 E Envs  
436 was similar. The correlation between the antigenic profiles of the 2-4 RM6 E Env  
437 solubilized in Cymal-5 and SMA indicates that membrane extraction without BMS-806  
438 results in similar non-State-1 Env conformations in these two preparations (Fig. 11). Of  
439 interest, State 2 has been suggested to represent a default intermediate conformation  
440 assumed when the State-1 conformation of the membrane Env is disrupted (68,69). Env  
441 solubilization may likewise consign Env to a default conformation resembling State 2, a  
442 model consistent with the smFRET profile of a Cymal-5-solubilized uncleaved Env (71).  
443 Very recent cryo-EM structures of cleaved HIV-1 Envs in SMALPs reveal asymmetric  
444 trimers (98); the distinct pattern of opening angles among the protomers resembles that  
445 seen for the uncleaved Env solubilized in Cymal-5 and amphipol A8-35 (71). These  
446 structures represent reasonable candidates for the default State-2 Env conformation  
447 that, at least upon binding CD4, is thought to be asymmetric (99). The Env-SMALP  
448 structures suggest that State 1-to-State 2 transitions may involve breaking trimer  
449 symmetry coupled with trimer tilting in the membrane (98). Together, these observations  
450 support a model in which disruption of the metastable symmetric State-1 conformation

451 by Env solubilization and loss of membrane interactions leads to an asymmetric trimer  
452 in the default intermediate (State-2) conformation. Changes in Env structure that are  
453 coupled to the breaking of symmetry result in the stabilization of State-2 (98), explaining  
454 the difficulty of reverting State 2 to State 1 in the absence of a membrane (59,85).

455

456 A more complete understanding of the differences between State 1 and State 2  
457 could assist the design of small-molecule entry inhibitors that prematurely activate or  
458 block Env transitions between these conformations (84-87,100). The antigenic  
459 differences that we identified between the solubilized cleaved Envs (potentially in State-  
460 2-like conformations) and the cleaved membrane Env (mostly in a State-1 conformation)  
461 may affect the efficacy of vaccine immunogens. A recent antigenicity analysis has  
462 suggested that only modest differences exist between the State-1 and State-2 Env  
463 conformations, although failure to distinguish cleaved and uncleaved Envs in that study  
464 may have diminished the ability of some of the antibodies to discriminate between these  
465 conformations (100). The results reported herein will guide future efforts to stabilize the  
466 State-1 Env further and to improve methods to solubilize HIV-1 Env with minimal  
467 conformational disruption.

468

## 469 **MATERIALS AND METHODS**

470 **HIV-1 Env constructs.** The wild-type (wt) HIV-1<sub>AD8</sub>, 2-4 RM6 E and AE.2 Envs were  
471 coexpressed with the Rev protein, using the natural arrangement of HIV-1 *env* and *rev*  
472 sequences (60,83). The Asp 718 (Kpn I) – Bam HI *env* fragments encoding the above  
473 Envs were inserted into the corresponding sites of the pSVIIIenv plasmid expressing the

474 HIV-1<sub>HXBc2</sub> Env and Rev. Thus, these Envs contain a signal peptide and part of the  
475 cytoplasmic tail from the HIV-1<sub>HXBc2</sub> Env. A GGGHHHHH (His<sub>6</sub>) tag was added to the  
476 carboxyl terminus of all three Envs. Compared with the HIV-1<sub>AD8</sub> Env, the 2-4 RM6 E  
477 Env has two State-1-stabilizing changes, Q114E and Q567K, and several additional  
478 lysine substitutions to improve crosslinking efficiency (R166K, R178K, R315K, R419K,  
479 R557K, R633K, Q658K, A667K and N677K) (83). Compared with the 2-4 RM6 E Env,  
480 the AE.2 Env has one additional State-1-stabilizing change, A582T, and an additional  
481 lysine substitution, R252K (83).

482

483 **SMA and DIBMA.** SMA (2:1) was purchased from Cray Valley and hydrolyzed as  
484 described (77). SMA and DIBMA variants were purchased from Cube Biotech.

485

486 **Reagents.** BMS-378806 (herein called BMS-806) was purchased from Selleckchem.  
487 Cymal-5 and Cymal-6 were purchased from Anatrace, RIPA buffer from ThermoFisher  
488 and Superflow Ni-NTA from Bio-Rad.

489

490 **Expression of HIV-1 Envs.** Human A549 cells inducibly expressing the wt HIV-1<sub>AD8</sub>  
491 Env, the 2-4 RM6 E Env and the AE.2 Env were established as described (43). A549  
492 cells constitutively expressing the reverse tet transactivator (rtTA) were transduced with  
493 HIV-1-based lentivirus vectors expressing Rev and the above Envs. The vector  
494 transcribes a bicistronic mRNA comprising *rev* and *env* and two selectable marker  
495 genes (puromycin-T2A-enhanced green fluorescent protein (EGFP)) fused in-frame with  
496 a T2A peptide-coding sequence. In the transduced cells, Env expression is controlled

497 by the Tet-Responsive Element (TRE) promoter and tet-on transcriptional regulatory  
498 elements. Env expression is induced by treating the cells with 2 ug/ml doxycycline. The  
499 Env-expressing cells were enriched by fluorescence-activated cell sorting for the co-  
500 expressed EGFP marker. These polyclonal A549 cell lines were used as sources of Env  
501 for the studies reported herein.

502

503 **Cell lines.** The A549 cells inducibly expressing the wt HIV-1<sub>AD8</sub>, 2-4 RM6 E and AE.2  
504 Envs were grown in DMEM/F12 supplemented with 10% FBS, L-glutamine and  
505 penicillin-streptomycin. All cell culture reagents are from Life Technologies.

506

507 **Antibodies.** Antibodies against HIV-1 Env were kindly supplied by Dr. Dennis Burton  
508 (Scripps), Drs. Peter Kwong and John Mascola (Vaccine Research Center, NIH), Dr.  
509 Barton Haynes (Duke), Dr. Hermann Katinger (Polymun), Dr. James Robinson (Tulane)  
510 and Dr. Marshall Posner (Mount Sinai Medical Center). In some cases, anti-Env  
511 antibodies were obtained through the NIH AIDS Reagent Program. Antibodies for  
512 Western blotting include goat anti-gp120 polyclonal antibody (ThermoFisher) and the  
513 4E10 human anti-gp41 antibody (Polymun). An HRP-conjugated goat anti-human IgG  
514 (Santa Cruz) and an HRP-conjugated goat anti-rabbit antibody (Santa Cruz) were used  
515 as secondary antibodies for Western blotting.

516

517 **Immunoprecipitation of cell-surface HIV-1 Env.** Doxycycline-induced A549-Env cells  
518 were washed twice with washing buffer (1x PBS + 5% FBS). The cells were then  
519 incubated with 5 µg/ml antibody for one hour at 4°C. After washing four times in

520 washing buffer, the cells were lysed in NP-40 lysis buffer (1% NP-40, 0.5 M NaCl, 10  
521 mM Tris, pH 7.5) for five minutes on ice. The lysates were cleared by centrifugation at  
522 13,200 x g for 10 minutes at 4°C, and the clarified supernatants were incubated with  
523 Protein A-Sepharose beads for one hour at room temperature. The beads were pelleted  
524 (1,000 rpm x 1 min) and washed three times with wash buffer (20 mM Tris-HCl (pH 8.0),  
525 100 mM (NH<sub>4</sub>)<sub>2</sub>SO<sub>4</sub>, 1 M NaCl and 0.5% NP-40). The beads were suspended in 2x  
526 lithium dodecyl sulfate (LDS) sample buffer, boiled and analyzed by Western blotting  
527 using 1:2000 goat anti-gp120 polyclonal antibody (ThermoFisher) and 1:2000 HRP-  
528 conjugated rabbit anti-goat IgG (ThermoFisher). The HIV-1 gp41 Env was analyzed by  
529 Western blotting with the 4E10 anti-gp41 antibody and HRP-conjugated goat anti-  
530 human IgG (Santa Cruz).

531

532 For analysis of total Env expression in the cells, clarified cell lysates were prepared from  
533 cells that were induced with doxycycline but not incubated with antibodies. The clarified  
534 cell lysates were analyzed by Western blotting as described above and serve as the  
535 Input samples.

536

537 **Membrane purification and DTSSP crosslinking.** A549 cells expressing the wt HIV-  
538 1<sub>AD8</sub> or 2-4 RM6 E Envs were incubated with 5 mM EDTA in 1x PBS at 37°C until the  
539 cells detached from the tissue-culture plates. The cells were pelleted and resuspended  
540 in 1x PBS. Cells were spun down at 1500 x g for 10 minutes. The supernatants were  
541 removed and homogenization buffer (10 mM Tris HCl (pH 7.5), 250 mM sucrose, 1 mM  
542 EDTA, 1x protease inhibitor cocktail) was added to the cell pellet. The cells were

543 transferred into a glass Dounce homogenizer and homogenized with 250 strokes on ice.  
544 The homogenate was spun at 1000 x g for 10 minutes at 4°C. The supernatants were  
545 centrifuged at 10,000 x g for 10 minutes at 4°C. The supernatants were spun again at  
546 100,000 x g for 35 minutes at 4°C. The pellet represented the purified membrane  
547 fraction.

548

549 For DTSSP crosslinking, membranes were washed in 1x PBS and centrifuged at  
550 100,000 g for 25 minutes. Membranes were resuspended in 1x PBS and crosslinked  
551 with 0.35 mM DTSSP at 4°C for 45 minutes.

552

553 **Immunoprecipitation of cell-membrane HIV-1 Envs.** Purified cell membranes from  
554 Env-expressing A549 cells were incubated with 5 ug/ml antibody for one hour at 4°C, in  
555 either the absence or presence of 10 µM BMS-806. The membranes were pelleted at  
556 13,200 x g for 10 minutes at 4°C. The pelleted membranes were lysed in 1% NP-40 with  
557 or without BMS-806 for 5 minutes on ice. The membrane lysates were then incubated  
558 with Protein A-Sepharose beads for one hour at 4°C. The precipitated proteins were  
559 subjected to Western blotting with a goat anti-gp120 antiserum or the human 4E10 anti-  
560 gp41 antibody, as described above.

561

562 For the Input sample, an aliquot of the cell membrane preparation was lysed in 1% NP-  
563 40 and subjected to Western blotting as described above.

564



565 **Solubilization of Env from membranes.** For extraction of Env from membranes, the  
566 purified membrane fractions were resuspended in the following buffers:  
567 SMA solubilization buffer (20 mM Tris-HCl, pH 8.0, 100 mM (NH<sub>4</sub>)<sub>2</sub>SO<sub>4</sub>, 250 mM  
568 NaCl 1% SMA, 1x protease inhibitor cocktail (Roche));  
569 DIBMA solubilization buffer (20 mM Tris-HCl, pH 8.0, 100 mM (NH<sub>4</sub>)<sub>2</sub>SO<sub>4</sub>, 250  
570 mM NaCl, 1% DIBMA, 1x protease inhibitor cocktail (Roche));  
571 Cymal-5 solubilization buffer (20 mM Tris-HCl, pH 8.0, 100 mM (NH<sub>4</sub>)<sub>2</sub>SO<sub>4</sub>, 250  
572 mM NaCl, 1% Cymal-5, 1x protease inhibitor cocktail (Roche)); and  
573 RIPA buffer (ThermoFisher) (25 mM Tris-HCl, pH 7.6, 150 mM NaCl, 1% NP-  
574 40,1% sodium deoxycholate, 0.1% SDS, 1x protease inhibitor cocktail (Roche)).

575  
576 Solubilized Envs were analyzed on reducing and non-reducing gels. For comparison of  
577 SMA and DIBMA variants, gels were silver stained using the Pierce Silver stain kit  
578 (Thermo Scientific) or Western blotted as described above.

579  
580 **Solubilization of Env from cells.** Env-expressing cells were induced with 2 ug/ml of  
581 doxycycline for two days to express HIV-1 Envs and detached by incubating with 5 mM  
582 EDTA at 37°C. Cells were aliquoted and lysed with the solubilization buffers described  
583 above at either 4°C or room temperature.

584  
585 **Association of gp120 with solubilized Env complexes.** The noncovalent association  
586 of gp120 with solubilized Env complexes was studied by precipitating the proteins using  
587 the carboxy-terminal His<sub>6</sub> tag. Clarified cell lysates were prepared from Env-expressing

588 A549 cells as described above. Aliquots of the lysates were saved for Western blotting  
589 to detect the gp160, gp120 and gp41 glycoproteins in the Input sample. The bulk of the  
590 lysates was incubated for 1 h or 16 h at 4°C or room temperature, in some cases in the  
591 presence of 10 µM BMS-806. The lysates were then incubated for 1 h with nickel-  
592 nitriloacetic acid (Ni-NTA) beads (Qiagen) at the indicated temperatures (4°C or room  
593 temperature), in some cases with 10 µM BMS-806. The beads were pelleted (1,000 rpm  
594 for 1 min at 4°C or room temperature), washed three times at 4°C or room temperature  
595 with wash buffer (20 mM Tris-HCl (pH 8.0), 100 mM (NH<sub>4</sub>)<sub>2</sub>SO<sub>4</sub>, 1 M NaCl, 30 mM  
596 imidazole), boiled in 2x LDS sample buffer, and analyzed by Western blotting as  
597 described above. The association of gp120 with the Env complex for each solubilization  
598 buffer was calculated as follows:

$$599 \text{ (gp120/gp160)}_{\text{precipitated}} \div \text{ (gp120/gp160)}_{\text{input}}$$

600

601 **Immunoprecipitation of solubilized Envs from cell lysates.** A549 cells were induced  
602 with doxycycline to express the 2-4 RM6 E Env. Forty-eight hours later, the cells were  
603 lysed with either Cymal-5 or SMA solubilization buffer, as described above. The 2-4  
604 RM6 E Env was incubated with Ni-NTA beads at 4°C for 1.5 hours. After incubation, the  
605 mixture was applied to an Eco-column (Biorad). The beads were washed with 30 bed  
606 volumes of washing buffer (20 mM Tris-HCl (pH 8.0), 100 mM (NH<sub>4</sub>)<sub>2</sub>SO<sub>4</sub>, 1 M NaCl, 30  
607 mM imidazole), and eluted with 10 bed volumes of elution buffer (20 mM Tris-HCl (pH  
608 8.0), 100 mM (NH<sub>4</sub>)<sub>2</sub>SO<sub>4</sub>, 250 mM NaCl, 250 mM imidazole). The purified Env was  
609 aliquoted and incubated with 10 µg/ml antibodies together with Protein A-Sepharose  
610 beads for 1 h at 4°C. For the samples with BMS-806, 10 µM BMS-806 was added

611 before cell lysis and remained in all the following steps. An aliquot without added  
612 antibody/beads served as the Input sample. The precipitated proteins and Input sample  
613 were Western blotted as described above.

614

615 **Antigenicity of Envs solubilized from purified membranes.** Cell membranes were  
616 prepared from A549 cells expressing the 2-4 RM6 E Env as described above. In some  
617 cases, the resuspended cell membranes were treated with 0.35 mM DTSSP crosslinker  
618 at room temperature for 45 minutes. In some experiments, BMS-806 at 10  $\mu$ M  
619 concentration was added to the membranes at the time of crosslinking. The membranes  
620 were then lysed in SMA solubilization buffer containing 10  $\mu$ M BMS-806 for 30 minutes  
621 at room temperature. The 2-4 RM6 E Env was incubated with Ni-NTA beads at 4°C for  
622 1.5 hours. After incubation, the mixture was applied to an Eco-column (Biorad). The Ni-  
623 NTA beads were washed with 30 bed volumes of washing buffer (20 mM Tris-HCl (pH  
624 8.0), 100 mM  $(\text{NH}_4)_2\text{SO}_4$ , 1 M NaCl, 30 mM imidazole), and eluted with 10 bed volumes  
625 of elution buffer (20 mM Tris-HCl (pH 8.0), 100 mM  $(\text{NH}_4)_2\text{SO}_4$ , 250 mM NaCl, 250 mM  
626 imidazole). For the experiments where counterselection with pNAbs was employed, the  
627 purified 2-4 RM6 E Env was incubated with 40  $\mu$ g/ml of 19b and 40  $\mu$ g/ml of F240  
628 antibodies and 100  $\mu$ l of Protein A-Sepharose at room temperature for 30 minutes. The  
629 mixture was applied to an Eco-column (Biorad) and the purified 2-4 RM6 E Env was  
630 collected in the flow-through.

631

632 **ACKNOWLEDGMENTS**

633 We thank Ms. Elizabeth Carpelan for manuscript preparation. Antibodies against HIV-1  
634 were kindly supplied by John C. Kappes (University of Alabama at Birmingham), Dennis  
635 Burton (Scripps), Peter Kwong and John Mascola (Vaccine Research Center NIH),  
636 Barton Haynes (Duke University), Hermann Katinger (Polymun), James Robinson  
637 (Tulane University), and Marshall Posner (Mount Sinai Medical Center). We thank the  
638 NIH HIV Reagent Program for providing additional reagents.

639

640 This work was supported by grants from the National Institutes of Health (grant nos.  
641 AI 145547, AI 124982, AI 150471, AI 129017 and AI 164562), a grant from Gilead  
642 Sciences, and by a gift from the late William F. McCarty-Cooper.

643

644 We declare no conflicts of interest.

645

646 **REFERENCES**

- 647
- 648 1. Wyatt R, Sodroski J. 1998. The HIV-1 envelope glycoproteins: fusogens,  
649 antigens, and immunogens. *Science* 280:1884-8.
- 650
- 651 2. Chen B. 2019. Molecular mechanism of HIV-1 entry. *Trends Microbiol* 27:878-  
652 891.
- 653
- 654 3. Harrison SC. 2015. Viral membrane fusion. *Virology* 479-480:498-507.
- 655
- 656 4. Willey RL, Bonifacino JS, Potts BJ, Martin MA, Klausner RD. 1988. Biosynthesis,  
657 cleavage, and degradation of the human immunodeficiency virus 1 envelope  
658 glycoprotein gp160. *Proc Natl Acad Sci U S A* 85:9580-4.
- 659
- 660 5. Earl PL, Moss B, Doms RW. 1991. Folding, interaction with GRP78-BiP,  
661 assembly, and transport of the human immunodeficiency virus type 1 envelope  
662 protein. *J Virol* 65:2047-55.
- 663
- 664 6. Pal R, Hoke GM, Sarngadharan MG. 1989. Role of oligosaccharides in the  
665 processing and maturation of envelope glycoproteins of human  
666 immunodeficiency virus type 1. *Proc Natl Acad Sci U S A* 86:3384-8.
- 667
- 668 7. Dewar RL, Vasudevachari MB, Natarajan V, Salzman NP. 1989. Biosynthesis  
669 and processing of human immunodeficiency virus type 1 envelope glycoproteins:  
670 effects of monensin on glycosylation and transport. *J Virol* 63:2452-6.
- 671
- 672 8. Zhang S, Nguyen HT, Ding H, Wang J, Zou S, Liu L, Guha D, Gabuzda D, Ho  
673 DD, Kappes JC, Sodroski J. 2021. Dual pathways of human immunodeficiency  
674 virus type 1 envelope glycoprotein trafficking modulate the selective exclusion of  
675 uncleaved oligomers from virions. *J Virol* 95:e01369-20.
- 676
- 677 9. Stein BS, Engleman EG. 1990. Intracellular processing of the gp160 HIV-1  
678 envelope precursor. Endoproteolytic cleavage occurs in a cis or medial  
679 compartment of the Golgi complex. *J Biol Chem* 265:2640-9.
- 680
- 681 10. Hallenberger S, Bosch V, Angliker H, Shaw E, Klenk HD, Garten W. 1992.  
682 Inhibition of furin-mediated cleavage activation of HIV-1 glycoprotein gp160.  
683 *Nature* 360:358-61.
- 684
- 685 11. Doores KJ, Bonomelli C, Harvey DJ, Vasiljevic S, Dwek RA, Burton DR, Crispin  
686 M, Scanlan CN. 2010. Envelope glycans of immunodeficiency virions are almost  
687 entirely oligomannose antigens. *Proc Natl Acad Sci U S A* 107:13800-5.
- 688
- 689 12. Go EP, Ding H, Zhang S, Ringe RP, Nicely N, Hua D, Steinbock RT, Golabek M,  
690 Alin J, Alam SM, Cupo A, Haynes BF, Kappes JC, Moore JP, Sodroski JG,  
691 Desaire H. 2017. A glycosylation benchmark profile for HIV-1 envelope

- 692 glycoprotein production based on eleven Env trimers. *J Virol* 91:e02428-16.  
693
- 694 13. Munro JB, Gorman J, Ma X, Zhou Z, Arthos J, Burton DR, Koff WC, Courter JR,  
695 Smith AB III, Kwong PD, Blanchard SC, Mothes W. 2014. Conformational  
696 dynamics of single HIV-1 envelope trimers on the surface of native virions.  
697 *Science* 346:759-63.  
698
- 699 14. Wu L, Gerard NP, Wyatt R, Choe H, Parolin C, Ruffing N, Borsetti A, Cardoso  
700 AA, Desjardin E, Newman W, Gerard C, Sodroski J. 1996. CD4-induced  
701 interaction of primary HIV-1 gp120 glycoproteins with the chemokine receptor  
702 CCR-5. *Nature* 384:179-83.  
703
- 704 15. Trkola A, Dragic T, Arthos J, Binley JM, Olson WC, Allaway GP, Cheng-Mayer C,  
705 Robinson J, Maddon PJ, Moore JP. 1996. CD4-dependent, antibody-sensitive  
706 interactions between HIV-1 and its co-receptor CCR-5. *Nature* 384:184-7.  
707
- 708 16. Khasnis MD, Halkidis K, Bhardwaj A, Root MJ. 2016. Receptor activation of HIV-  
709 1 Env leads to asymmetric exposure of the gp41 trimer. *PLoS Pathog*  
710 12:e1006098.  
711
- 712 17. Furuta RA, Wild CT, Weng Y, Weiss CD. 1998. Capture of an early fusion-active  
713 conformation of HIV-1 gp41. *Nat Struct Biol* 5:276-9.  
714
- 715 18. Koshiya T, Chan DC. 2003. The prefusogenic intermediate of HIV-1 gp41  
716 contains exposed C-peptide regions. *J Biol Chem* 278:7573-9.  
717
- 718 19. He Y, Vassell R, Zaitseva M, Nguyen N, Yang Z, Weng Y, Weiss CD. 2003.  
719 Peptides trap the human immunodeficiency virus type 1 envelope glycoprotein  
720 fusion intermediate at two sites. *J Virol* 77:1666-71.  
721
- 722 20. Chan DC, Fass D, Berger JM, Kim PS. 1997. Core structure of gp41 from the  
723 HIV envelope glycoprotein. *Cell* 89:263-73.  
724
- 725 21. Weissenhorn W, Dessen A, Harrison SC, Skehel JJ, Wiley DC. 1997. Atomic  
726 structure of the ectodomain from HIV-1 gp41. *Nature* 387:426-30.  
727
- 728 22. Lu M, Blacklow SC, Kim PS. 1995. A trimeric structural domain of the HIV-1  
729 transmembrane glycoprotein. *Nat Struct Biol* 2:1075-82.  
730
- 731 23. Melikyan GB, Markosyan RM, Hemmati H, Delmedico MK, Lambert DM, Cohen  
732 FS. 2000. Evidence that the transition of HIV-1 gp41 into a six-helix bundle, not  
733 the bundle configuration, induces membrane fusion. *J Cell Biol* 151:413-23.  
734
- 735 24. Wilen CB, Tilton JC, Doms RW. 2012. Molecular mechanisms of HIV entry. *Adv*  
736 *Exp Med Biol* 726:223-42.  
737

- 738 25. Bonsignori M, Liao HX, Gao F, Williams WB, Alam SM, Montefiori DC, Haynes  
739 BF. 2017. Antibody-virus co-evolution in HIV infection: paths for HIV vaccine  
740 development. *Immunol Rev* 275:145-160.  
741
- 742 26. Kwong PD, Mascola JR. 2018. HIV-1 vaccines based on antibody identification,  
743 B cell ontogeny, and epitope structure. *Immunity* 48:855-871.  
744
- 745 27. Sok D, Burton DR. 2018. Recent progress in broadly neutralizing antibodies to  
746 HIV. *Nat Immunol* 19:1179-1188.  
747
- 748 28. Stewart-Jones GB, Soto C, Lemmin T, Chuang GY, Druz A, Kong R, Thomas  
749 PV, Wagh K, Zhou T, Behrens AJ, Bylund T, Choi CW, Davison JR, Georgiev IS,  
750 Joyce MG, Kwon YD, Pancera M, Taft J, Yang Y, Zhang B, Shivatare SS,  
751 Shivatare VS, Lee CC, Wu CY, Bewley CA, Burton DR, Koff WC, Connors M,  
752 Crispin M, Baxa U, Korber BT, Wong CH, Mascola JR, Kwong PD. 2016.  
753 Trimeric HIV-1-Env structures define glycan shields from Clades A, B, and G.  
754 *Cell* 165:813-26.  
755
- 756 29. Ward AB, Wilson IA. 2017. The HIV-1 envelope glycoprotein structure: nailing  
757 down a moving target. *Immunol Rev* 275:21-32.  
758
- 759 30. Wei X, Decker JM, Wang S, Hui H, Kappes JC, Wu X, Salazar-Gonzalez JF,  
760 Salazar MG, Kilby JM, Saag MS, Komarova NL, Nowak MA, Hahn BH, Kwong  
761 PD, Shaw GM. 2003. Antibody neutralization and escape by HIV-1. *Nature*  
762 422:307-12.  
763
- 764 31. Labrijn AF, Poignard P, Raja A, Zwick MB, Delgado K, Franti M, Binley J, Vivona  
765 V, Grundner C, Huang CC, Venturi M, Petropoulos CJ, Wrin T, Dimitrov DS,  
766 Robinson J, Kwong PD, Wyatt RT, Sodroski J, Burton DR. 2003. Access of  
767 antibody molecules to the conserved coreceptor binding site on glycoprotein  
768 gp120 is sterically restricted on primary human immunodeficiency virus type 1. *J*  
769 *Virology* 77:10557-65.  
770
- 771 32. Moore PL, Ranchope N, Lambson BE, Gray ES, Cave E, Abrahams MR,  
772 Bandawe G, Mlisana K, Abdool Karim SS, Williamson C, Morris L, Study C,  
773 *Immunology NCfHAV*. 2009. Limited neutralizing antibody specificities drive  
774 neutralization escape in early HIV-1 subtype C infection. *PLoS Pathog*  
775 5:e1000598.  
776
- 777 33. Haim H, Salas I, Sodroski J. 2013. Proteolytic processing of the human  
778 immunodeficiency virus envelope glycoprotein precursor decreases  
779 conformational flexibility. *J Virol* 87:1884-9.  
780
- 781 34. Pancera M, Wyatt R. 2005. Selective recognition of oligomeric HIV-1 primary  
782 isolate envelope glycoproteins by potentially neutralizing ligands requires efficient  
783 precursor cleavage. *Virology* 332:145-56.

- 784  
785 35. Chakrabarti BK, Pancera M, Phogat S, O'Dell S, McKee K, Guenaga J, Robinson  
786 J, Mascola J, Wyatt RT. 2011. HIV type 1 Env precursor cleavage state affects  
787 recognition by both neutralizing and nonneutralizing gp41 antibodies. *AIDS Res*  
788 *Hum Retroviruses* 27:877-87.  
789  
790 36. Guttman M, Cupo A, Julien JP, Sanders RW, Wilson IA, Moore JP, Lee KK.  
791 2015. Antibody potency relates to the ability to recognize the closed, pre-fusion  
792 form of HIV Env. *Nat Commun* 6:6144.  
793  
794 37. Haim H, Salas I, McGee K, Eichelberger N, Winter E, Pacheco B, Sodroski J.  
795 2013. Modeling virus- and antibody-specific factors to predict human  
796 immunodeficiency virus neutralization efficiency. *Cell Host Microbe* 14:547-58.  
797  
798 38. Gray ES, Taylor N, Wycuff D, Moore PL, Tomaras GD, Wibmer CK, Puren A,  
799 DeCamp A, Gilbert PB, Wood B, Montefiori DC, Binley JM, Shaw GM, Haynes  
800 BF, Mascola JR, Morris L. 2009. Antibody specificities associated with  
801 neutralization breadth in plasma from human immunodeficiency virus type 1  
802 subtype C-infected blood donors. *J Virol* 83:8925-37.  
803  
804 39. Sather DN, Armann J, Ching LK, Mavrantonis A, Sellhorn G, Caldwell Z, Yu X,  
805 Wood B, Self S, Kalams S, Stamatatos L. 2009. Factors associated with the  
806 development of cross-reactive neutralizing antibodies during human  
807 immunodeficiency virus type 1 infection. *J Virol* 83:757-69.  
808  
809 40. Walker LM, Simek MD, Priddy F, Gach JS, Wagner D, Zwick MB, Phogat SK,  
810 Poignard P, Burton DR. 2010. A limited number of antibody specificities mediate  
811 broad and potent serum neutralization in selected HIV-1 infected individuals.  
812 *PLoS Pathog* 6:e1001028.  
813  
814 41. Gray ES, Madiga MC, Hermanus T, Moore PL, Wibmer CK, Tumba NL, Werner  
815 L, Mlisana K, Sibeko S, Williamson C, Abdool Karim SS, Morris L, Team CS.  
816 2011. The neutralization breadth of HIV-1 develops incrementally over four years  
817 and is associated with CD4+ T cell decline and high viral load during acute  
818 infection. *J Virol* 85:4828-40.  
819  
820 42. Hraber P, Seaman MS, Bailer RT, Mascola JR, Montefiori DC, Korber BT. 2014.  
821 Prevalence of broadly neutralizing antibody responses during chronic HIV-1  
822 infection. *AIDS* 28:163-9.  
823  
824 43. Zou S, Zhang S, Gaffney A, Ding H, Lu M, Grover JR, Farrell M, Nguyen HT,  
825 Zhao C, Anang S, Zhao M, Mohammadi M, Blanchard SC, Abrams C, Madani N,  
826 Mothes W, Kappes JC, Smith AB III, Sodroski J. 2020. Long-acting BMS-378806  
827 analogues stabilize the State-1 conformation of the human immunodeficiency  
828 virus type 1 envelope glycoproteins. *J Virol* 94:e00148-20.  
829



- 830 44. McCoy LE, Burton DR. 2017. Identification and specificity of broadly neutralizing  
831 antibodies against HIV. *Immunol Rev* 275:11-20.  
832
- 833 45. Haynes BF, Burton DR, Mascola JR. 2019. Multiple roles for HIV broadly  
834 neutralizing antibodies. *Sci Transl Med* 11:eaaz2686.  
835
- 836 46. Mascola JR, Lewis MG, Stiegler G, Harris D, VanCott TC, Hayes D, Louder MK,  
837 Brown CR, Sapan CV, Frankel SS, Lu Y, Robb ML, Katinger H, Birx DL. 1999.  
838 Protection of macaques against pathogenic simian/human immunodeficiency  
839 virus 89.6PD by passive transfer of neutralizing antibodies. *J Virol* 73:4009-18.  
840
- 841 47. Mascola JR, Stiegler G, VanCott TC, Katinger H, Carpenter CB, Hanson CE,  
842 Beary H, Hayes D, Frankel SS, Birx DL, Lewis MG. 2000. Protection of  
843 macaques against vaginal transmission of a pathogenic HIV-1/SIV chimeric virus  
844 by passive infusion of neutralizing antibodies. *Nat Med* 6:207-10.  
845
- 846 48. Moldt B, Rakasz EG, Schultz N, Chan-Hui PY, Swiderek K, Weisgrau KL,  
847 Piaskowski SM, Bergman Z, Watkins DI, Poignard P, Burton DR. 2012. Highly  
848 potent HIV-specific antibody neutralization in vitro translates into effective  
849 protection against mucosal SHIV challenge in vivo. *Proc Natl Acad Sci U S A*  
850 109:18921-5.  
851
- 852 49. Parren PW, Marx PA, Hessel AJ, Luckay A, Harouse J, Cheng-Mayer C, Moore  
853 JP, Burton DR. 2001. Antibody protects macaques against vaginal challenge with  
854 a pathogenic R5 simian/human immunodeficiency virus at serum levels giving  
855 complete neutralization in vitro. *J Virol* 75:8340-7.  
856
- 857 50. Pauthner M, Havenar-Daughton C, Sok D, Nkolola JP, Bastidas R, Boopathy AV,  
858 Carnathan DG, Chandrashekar A, Cirelli KM, Cottrell CA, Eroshkin AM, Guenaga  
859 J, Kaushik K, Kulp DW, Liu J, McCoy LE, Oom AL, Ozorowski G, Post KW,  
860 Sharma SK, Steichen JM, de Taeye SW, Tokatlian T, Torrents de la Pena A,  
861 Butera ST, LaBranche CC, Montefiori DC, Silvestri G, Wilson IA, Irvine DJ,  
862 Sanders RW, Schief WR, Ward AB, Wyatt RT, Barouch DH, Crotty S, Burton DR.  
863 2017. Elicitation of robust Tier 2 neutralizing antibody responses in nonhuman  
864 primates by HIV envelope trimer immunization using optimized approaches.  
865 *Immunity* 46:1073-1088 e6.  
866
- 867 51. Torrents de la Pena A, de Taeye SW, Sliепен K, LaBranche CC, Burger JA,  
868 Schermer EE, Montefiori DC, Moore JP, Klasse PJ, Sanders RW. 2018.  
869 Immunogenicity in Rabbits of HIV-1 SOSIP Trimers from Clades A, B, and C,  
870 given individually, sequentially, or in combination. *J Virol* 92:e01957-17.  
871
- 872 52. Dubrovskaya V, Tran K, Ozorowski G, Guenaga J, Wilson R, Bale S, Cottrell CA,  
873 Turner HL, Seabright G, O'Dell S, Torres JL, Yang L, Feng Y, Leaman DP,  
874 Vazquez Bernat N, Liban T, Louder M, McKee K, Bailer RT, Movsesyan A, Doria-  
875 Rose NA, Pancera M, Karlsson Hedestam GB, Zwick MB, Crispin M, Mascola

- 876 JR, Ward AB, Wyatt RT. 2019. Vaccination with glycan-modified HIV NFL  
877 envelope trimer-liposomes elicits broadly neutralizing antibodies to multiple sites  
878 of vulnerability. *Immunity* 51:915-929 e7.  
879
- 880 53. Xu K, Acharya P, Kong R, Cheng C, Chuang GY, Liu K, Louder MK, O'Dell S,  
881 Rawi R, Sastry M, Shen CH, Zhang B, Zhou T, Asokan M, Bailer RT, Chambers  
882 M, Chen X, Choi CW, Dandey VP, Doria-Rose NA, Druz A, Eng ET, Farney SK,  
883 Foulds KE, Geng H, Georgiev IS, Gorman J, Hill KR, Jafari AJ, Kwon YD, Lai YT,  
884 Lemmin T, McKee K, Ohr TY, Ou L, Peng D, Rowshan AP, Sheng Z, Todd JP,  
885 Tsybovsky Y, Viox EG, Wang Y, Wei H, Yang Y, Zhou AF, Chen R, Yang L,  
886 Scorpio DG, McDermott AB, Shapiro L, et al. 2018. Epitope-based vaccine  
887 design yields fusion peptide-directed antibodies that neutralize diverse strains of  
888 HIV-1. *Nat Med* 24:857-867.  
889
- 890 54. Sanders RW, van Gils MJ, Derking R, Sok D, Ketas TJ, Burger JA, Ozorowski G,  
891 Cupo A, Simonich C, Goo L, Arendt H, Kim HJ, Lee JH, Pugach P, Williams M,  
892 Debnath G, Moldt B, van Breemen MJ, Isik G, Medina-Ramirez M, Back JW, Koff  
893 WC, Julien JP, Rakasz EG, Seaman MS, Guttman M, Lee KK, Klasse PJ,  
894 LaBranche C, Schief WR, Wilson IA, Overbaugh J, Burton DR, Ward AB,  
895 Montefiori DC, Dean H, Moore JP. 2015. HIV-1 VACCINES. HIV-1 neutralizing  
896 antibodies induced by native-like envelope trimers. *Science* 349:aac4223.  
897
- 898 55. Alshafi N, Anand SP, Castillo-Menendez L, Verly MM, Medjahed H, Prevost J,  
899 Herschhorn A, Richard J, Schon A, Melillo B, Freire E, Smith AB III, Sodroski J,  
900 Finzi A. 2018. SOSIP changes affect human immunodeficiency virus type 1  
901 envelope glycoprotein conformation and CD4 engagement. *J Virol* 92.  
902
- 903 56. Castillo-Menendez LR, Nguyen HT, Sodroski J. 2019. Conformational differences  
904 between functional human immunodeficiency virus envelope glycoprotein trimers  
905 and stabilized soluble trimers. *J Virol* 93:e01709-18.  
906
- 907 57. Cao L, Pauthner M, Andrabi R, Rantalainen K, Berndsen Z, Diedrich JK, Menis  
908 S, Sok D, Bastidas R, Park SR, Delahunty CM, He L, Guenaga J, Wyatt RT,  
909 Schief WR, Ward AB, Yates JR, 3rd, Burton DR, Paulson JC. 2018. Differential  
910 processing of HIV envelope glycans on the virus and soluble recombinant trimer.  
911 *Nat Commun* 9:3693.  
912
- 913 58. Torrents de la Pena A, Rantalainen K, Cottrell CA, Allen JD, van Gils MJ, Torres  
914 JL, Crispin M, Sanders RW, Ward AB. 2019. Similarities and differences between  
915 native HIV-1 envelope glycoprotein trimers and stabilized soluble trimer  
916 mimetics. *PLoS Pathog* 15:e1007920.  
917
- 918 59. Lu M, Ma X, Castillo-Menendez LR, Gorman J, Alshafi N, Ermel U, Terry DS,  
919 Chambers M, Peng D, Zhang B, Zhou T, Reichard N, Wang K, Grover JR,  
920 Carman BP, Gardner MR, Nikic-Spiegel I, Sugawara A, Arthos J, Lemke EA,  
921 Smith AB III, Farzan M, Abrams C, Munro JB, McDermott AB, Finzi A, Kwong

- 922 PD, Blanchard SC, Sodroski JG, Mothes W. 2019. Associating HIV-1 envelope  
923 glycoprotein structures with states on the virus observed by smFRET. *Nature*  
924 568:415-419.
- 925
- 926 60. Haim H, Strack B, Kassa A, Madani N, Wang L, Courter JR, Princiotta A, McGee  
927 K, Pacheco B, Seaman MS, Smith AB III, Sodroski J. 2011. Contribution of  
928 intrinsic reactivity of the HIV-1 envelope glycoproteins to CD4-independent  
929 infection and global inhibitor sensitivity. *PLoS Pathog* 7:e1002101.
- 930
- 931 61. Bradley T, Trama A, Tumba N, Gray E, Lu X, Madani N, Jahanbakhsh F, Eaton  
932 A, Xia SM, Parks R, Lloyd KE, Sutherland LL, Scearce RM, Bowman CM,  
933 Barnett S, Abdool-Karim SS, Boyd SD, Melillo B, Smith AB III, Sodroski J, Kepler  
934 TB, Alam SM, Gao F, Bonsignori M, Liao HX, Moody MA, Montefiori D, Santra S,  
935 Morris L, Haynes BF. 2016. Amino acid changes in the HIV-1 gp41 membrane  
936 proximal region control virus neutralization sensitivity. *EBioMedicine* 12:196-207.
- 937
- 938 62. Ringe R, Bhattacharya J. 2012. Association of enhanced HIV-1 neutralization by  
939 a single Y681H substitution in gp41 with increased gp120-CD4 interaction and  
940 macrophage infectivity. *PLoS One* 7:e37157.
- 941
- 942 63. Blish CA, Nguyen MA, Overbaugh J. 2008. Enhancing exposure of HIV-1  
943 neutralization epitopes through mutations in gp41. *PLoS Med* 5:e9.
- 944
- 945 64. Salimi H, Johnson J, Flores MG, Zhang MS, O'Malley Y, Houtman JC, Schlievert  
946 PM, Haim H. 2020. The lipid membrane of HIV-1 stabilizes the viral envelope  
947 glycoproteins and modulates their sensitivity to antibody neutralization. *J Biol*  
948 *Chem* 295:348-362.
- 949
- 950 65. Wang Q, Esnault F, Zhao M, Chiu TJ, Smith AB III, Nguyen HT, Sodroski JG.  
951 2022. Global increases in human immunodeficiency virus neutralization  
952 sensitivity due to alterations in the membrane-proximal external region of the  
953 envelope glycoprotein can be minimized by distant State 1-stabilizing changes. *J*  
954 *Virology* 96:e0187821.
- 955
- 956 66. Hardy D, Bill RM, Jawhari A, Rothnie AJ. 2016. Overcoming bottlenecks in the  
957 membrane protein structural biology pipeline. *Biochem Soc Trans* 44:838-44.
- 958
- 959 67. Yao X, Fan X, Yan N. 2020. Cryo-EM analysis of a membrane protein embedded  
960 in the liposome. *Proc Natl Acad Sci U S A* 117:18497-18503.
- 961
- 962 68. Herschhorn A, Ma X, Gu C, Ventura JD, Castillo-Menendez L, Melillo B, Terry  
963 DS, Smith AB III, Blanchard SC, Munro JB, Mothes W, Finzi A, Sodroski J. 2016.  
964 Release of gp120 restraints leads to an entry-competent intermediate state of the  
965 HIV-1 envelope glycoproteins. *mBio* 7:e01598-16.
- 966
- 967 69. Herschhorn A, Gu C, Moraca F, Ma X, Farrell M, Smith AB III, Pancera M,

- 968 Kwong PD, Schon A, Freire E, Abrams C, Blanchard SC, Mothes W, Sodroski  
969 JG. 2017. The beta20-beta21 of gp120 is a regulatory switch for HIV-1 Env  
970 conformational transitions. *Nat Commun* 8:1049.  
971
- 972 70. Lee JH, Ozorowski G, Ward AB. 2016. Cryo-EM structure of a native, fully  
973 glycosylated, cleaved HIV-1 envelope trimer. *Science* 351:1043-8.  
974
- 975 71. Zhang S, Wang K, Wang WL, Nguyen HT, Chen S, Lu M, Go EP, Ding H,  
976 Steinbock RT, Desaire H, Kappes JC, Sodroski J, Mao Y. 2021. Asymmetric  
977 structures and conformational plasticity of the uncleaved full-length human  
978 immunodeficiency virus envelope glycoprotein trimer. *J Virol* 95:e0052921.  
979
- 980 72. Rantalainen K, Berndsen ZT, Antanasijevic A, Schiffner T, Zhang X, Lee WH,  
981 Torres JL, Zhang L, Irimia A, Copps J, Zhou KH, Kwon YD, Law WH, Schramm  
982 CA, Verardi R, Krebs SJ, Kwong PD, Doria-Rose NA, Wilson IA, Zwick MB,  
983 Yates JR, 3rd, Schief WR, Ward AB. 2020. HIV-1 envelope and MPER antibody  
984 structures in lipid assemblies. *Cell Rep* 31:107583.  
985
- 986 73. Pan J, Peng H, Chen B, Harrison SC. 2020. Cryo-EM Structure of Full-length  
987 HIV-1 Env Bound With the Fab of Antibody PG16. *J Mol Biol* 432:1158-1168.  
988
- 989 74. Long AR, O'Brien CC, Malhotra K, Schwall CT, Albert AD, Watts A, Alder NN.  
990 2013. A detergent-free strategy for the reconstitution of active enzyme  
991 complexes from native biological membranes into nanoscale discs. *BMC*  
992 *Biotechnol* 13:41.  
993
- 994 75. Knowles TJ, Finka R, Smith C, Lin YP, Dafforn T, Overduin M. 2009. Membrane  
995 proteins solubilized intact in lipid containing nanoparticles bounded by styrene  
996 maleic acid copolymer. *J Am Chem Soc* 131:7484-5.  
997
- 998 76. Jamshad M, Grimard V, Idini I, Knowles TJ, Dowle MR, Schofield N, Sridhar P,  
999 Lin YP, Finka R, Wheatley M, Thomas OR, Palmer RE, Overduin M, Govaerts C,  
1000 Ruyschaert JM, Edler KJ, Dafforn TR. 2015. Structural analysis of a  
1001 nanoparticle containing a lipid bilayer used for detergent-free extraction of  
1002 membrane proteins. *Nano Res* 8:774-789.  
1003
- 1004 77. Lee SC, Knowles TJ, Postis VL, Jamshad M, Parslow RA, Lin YP, Goldman A,  
1005 Sridhar P, Overduin M, Muench SP, Dafforn TR. 2016. A method for detergent-  
1006 free isolation of membrane proteins in their local lipid environment. *Nat Protoc*  
1007 11:1149-62.  
1008
- 1009 78. Orwick MC, Judge PJ, Procek J, Lindholm L, Graziadei A, Engel A, Grobner G,  
1010 Watts A. 2012. Detergent-free formation and physicochemical characterization of  
1011 nanosized lipid-polymer complexes: Lipodisq. *Angew Chem Int Ed Engl* 51:4653-  
1012 7.  
1013

- 1014 79. Postis V, Rawson S, Mitchell JK, Lee SC, Parslow RA, Dafforn TR, Baldwin SA,  
1015 Muench SP. 2015. The use of SMALPs as a novel membrane protein scaffold for  
1016 structure study by negative stain electron microscopy. *Biochim Biophys Acta*  
1017 1848:496-501.  
1018
- 1019 80. Morrison KA, Akram A, Mathews A, Khan ZA, Patel JH, Zhou C, Hardy DJ,  
1020 Moore-Kelly C, Patel R, Odiba V, Knowles TJ, Javed MU, Chmel NP, Dafforn TR,  
1021 Rothnie AJ. 2016. Membrane protein extraction and purification using styrene-  
1022 maleic acid (SMA) copolymer: effect of variations in polymer structure. *Biochem J*  
1023 473:4349-4360.  
1024
- 1025 81. Jamshad M, Charlton J, Lin YP, Routledge SJ, Bawa Z, Knowles TJ, Overduin  
1026 M, Dekker N, Dafforn TR, Bill RM, Poyner DR, Wheatley M. 2015. G-protein  
1027 coupled receptor solubilization and purification for biophysical analysis and  
1028 functional studies, in the total absence of detergent. *Biosci Rep* 35:e00188.  
1029
- 1030 82. Qiu W, Fu Z, Xu GG, Grassucci RA, Zhang Y, Frank J, Hendrickson WA, Guo Y.  
1031 2018. Structure and activity of lipid bilayer within a membrane-protein  
1032 transporter. *Proc Natl Acad Sci U S A* 115:12985-12990.  
1033
- 1034 83. Nguyen HT, Qualizza A, Anang S, Zhao M, Zou S, Zhou R, Wang Q, Zhang S,  
1035 Deshpande A, Ding H, Chiu TJ, Smith AB III, Kappes JC, Sodroski JG. 2022.  
1036 Functional and highly cross-linkable HIV-1 envelope glycoproteins enriched in a  
1037 pretriggered conformation. *J Virol* 96:e0166821.  
1038
- 1039 84. Lin PF, Blair W, Wang T, Spicer T, Guo Q, Zhou N, Gong YF, Wang HG, Rose  
1040 R, Yamanaka G, Robinson B, Li CB, Fridell R, Deminie C, Demers G, Yang Z,  
1041 Zadjura L, Meanwell N, Colonno R. 2003. A small molecule HIV-1 inhibitor that  
1042 targets the HIV-1 envelope and inhibits CD4 receptor binding. *Proc Natl Acad Sci*  
1043 *U S A* 100:11013-8.  
1044
- 1045 85. Lu M, Ma X, Reichard N, Terry DS, Arthos J, Smith AB III, Sodroski JG,  
1046 Blanchard SC, Mothes W. 2020. Shedding-resistant HIV-1 envelope  
1047 glycoproteins adopt downstream conformations that remain responsive to  
1048 conformation-preferring ligands. *J Virol* 94:e00597-20.  
1049
- 1050 86. Si Z, Madani N, Cox JM, Chruma JJ, Klein JC, Schon A, Phan N, Wang L, Biorn  
1051 AC, Cocklin S, Chaiken I, Freire E, Smith AB III, Sodroski JG. 2004. Small-  
1052 molecule inhibitors of HIV-1 entry block receptor-induced conformational  
1053 changes in the viral envelope glycoproteins. *Proc Natl Acad Sci U S A* 101:5036-  
1054 41.  
1055
- 1056 87. Pancera M, Lai YT, Bylund T, Druz A, Narpala S, O'Dell S, Schon A, Bailer RT,  
1057 Chuang GY, Geng H, Louder MK, Rawi R, Soumana DI, Finzi A, Herschhorn A,  
1058 Madani N, Sodroski J, Freire E, Langley DR, Mascola JR, McDermott AB, Kwong  
1059 PD. 2017. Crystal structures of trimeric HIV envelope with entry inhibitors BMS-

- 1060 378806 and BMS-626529. *Nat Chem Biol* 13:1115-1122.  
1061
- 1062 88. Nguyen HT, Wang Q, Anang S, Sodroski J. Characterization of the human  
1063 immunodeficiency virus (HIV-1) envelope glycoprotein conformational states on  
1064 infectious virus particles. *J Virol*, in the press.  
1065
- 1066 89. Oluwole AO, Danielczak B, Meister A, Babalola JO, Vargas C, Keller S. 2017.  
1067 Solubilization of membrane proteins into functional lipid-bilayer nanodiscs using a  
1068 diisobutylene/maleic acid copolymer. *Angew Chem Int Ed Engl* 56:1919-1924.  
1069
- 1070 90. Gulamhussein AA, Uddin R, Tighe BJ, Poyner DR, Rothnie AJ. 2020. A  
1071 comparison of SMA (styrene maleic acid) and DIBMA (di-isobutylene maleic  
1072 acid) for membrane protein purification. *Biochim Biophys Acta Biomembr*  
1073 1862:183281.  
1074
- 1075 91. Walker LM, Phogat SK, Chan-Hui PY, Wagner D, Phung P, Goss JL, Wrin T,  
1076 Simek MD, Fling S, Mitcham JL, Lehrman JK, Priddy FH, Olsen OA, Frey SM,  
1077 Hammond PW, Protocol GPI, Kaminsky S, Zamb T, Moyle M, Koff WC, Poignard  
1078 P, Burton DR. 2009. Broad and potent neutralizing antibodies from an African  
1079 donor reveal a new HIV-1 vaccine target. *Science* 326:285-9.  
1080
- 1081 92. Prabudiansyah I, Kusters I, Caforio A, Driessen AJ. 2015. Characterization of the  
1082 annular lipid shell of the Sec translocon. *Biochim Biophys Acta* 1848:2050-6.  
1083
- 1084 93. Nestorow SA, Dafforn TR, Frasca V. 2021. Biophysical characterisation of  
1085 SMALPs. *Biochem Soc Trans* 49:2037-2050.  
1086
- 1087 94. Dilworth MV, Findlay HE, Booth PJ. 2021. Detergent-free purification and  
1088 reconstitution of functional human serotonin transporter (SERT) using  
1089 diisobutylene maleic acid (DIBMA) copolymer. *Biochim Biophys Acta Biomembr*  
1090 1863:183602.  
1091
- 1092 95. Gohain N, Tolbert WD, Orlandi C, Richard J, Ding S, Chen X, Bonsor DA,  
1093 Sundberg EJ, Lu W, Ray K, Finzi A, Lewis GK, Pazgier M. 2016. Molecular basis  
1094 for epitope recognition by non-neutralizing anti-gp41 antibody F240. *Sci Rep*  
1095 6:36685.  
1096
- 1097 96. Leaman DP, Lee JH, Ward AB, Zwick MB. 2015. Immunogenic display of purified  
1098 chemically cross-linked HIV-1 spikes. *J Virol* 89:6725-45.  
1099
- 1100 97. Yuan W, Bazick J, Sodroski J. 2006. Characterization of the multiple  
1101 conformational states of free monomeric and trimeric human immunodeficiency  
1102 virus envelope glycoproteins after fixation by cross-linker. *J Virol* 80:6725-37.  
1103
- 1104 98. Wang K, Zhang S, Go EP, Ding H, Wang WL, Nguyen HT, Kappes JC, Desaire  
1105 H, Sodroski J, Mao Y. Asymmetric conformations of cleaved HIV-1 envelope

- 1106 glycoprotein trimers in styrene-maleic acid lipid nanoparticles. Manuscript  
1107 submitted.  
1108
- 1109 99. Ma X, Lu M, Gorman J, Terry DS, Hong X, Zhou Z, Zhao H, Altman RB, Arthos J,  
1110 Blanchard SC, Kwong PD, Munro JB, Mothes W. 2018. HIV-1 Env trimer opens  
1111 through an asymmetric intermediate in which individual protomers adopt distinct  
1112 conformations. *Elife* 7:e34271.  
1113
- 1114 100. Madani N, Princiotta AM, Zhao C, Jahanbakhshsefidi F, Mertens M, Herschhorn  
1115 A, Melillo B, Smith AB III, Sodroski J. 2017. Activation and inactivation of primary  
1116 human immunodeficiency virus envelope glycoprotein trimers by CD4-mimetic  
1117 compounds. *J Virol* 91:e01880-16.  
1118
- 1119 101. Cale EM, Driscoll JI, Lee M, Gorman J, Zhou T, Lu M, Geng H, Lai YT, Chuang  
1120 GY, Doria-Rose NA, Mothes W, Kwong PD, Mascola JR. 2022. Antigenic  
1121 analysis of the HIV-1 envelope trimer implies small differences between  
1122 structural states 1 and 2. *J Biol Chem* 298:101819.  
1123  
1124

1125 **Table 1. Antibodies recognizing HIV-1 Env epitopes.**

1126

**Broadly neutralizing antibodies (bNAbs)**

| <u>Antibody</u>       | <u>Epitope</u>                                |
|-----------------------|-----------------------------------------------|
| 2G12                  | gp120 outer domain glycans                    |
| PGT121                | gp120 V3 glycans                              |
| PG9<br>PG16<br>PGT145 | gp120 V1/V2 quaternary (trimer apex)          |
| VRC01<br>VRC03        | gp120 CD4-binding site (CD4BS)                |
| PGT151<br>35O22       | gp120-gp41 interface                          |
| 4E10<br>10E8          | gp41 membrane-proximal external region (MPER) |

**Poorly neutralizing antibodies (pNAbs)**

| <u>Antibody</u> | <u>Epitope</u>                  |
|-----------------|---------------------------------|
| 19b             | gp120 V3                        |
| F105            | gp120 CD4-binding site (CD4BS)  |
| 902090          | gp120 V2 linear                 |
| 17b             | gp120 CD4-induced (CD4i)        |
| F240            | gp41 disulfide loop (Cluster I) |

1127

1128



1129 **FIGURE LEGENDS**

1130 **FIG 1 Antibody recognition of the 2-4 RM6 E Env on the cell surface.** (A) A549

1131 cells were induced with doxycycline to express 2-4 RM6 E Env. The cells were  
1132 detached from the tissue-culture plates with 5 mM EDTA in 1x PBS. After pelleting and  
1133 resuspension, the cells were aliquoted and incubated with the indicated antibodies.

1134 After washing, the cells were lysed in NP-40 lysis buffer and the cell lysates were  
1135 incubated with Protein A-Sepharose beads. The precipitated antibody-Env complexes  
1136 were Western blotted with a goat anti-gp120 antiserum (upper panel) or the human

1137 4E10 anti-gp41 antibody (lower panel). The experiment was repeated twice and a

1138 typical result is shown. (B) The gp160 and gp120 bands in A were quantified using Fiji

1139 Image J (NIH). The intensities of the gp160 and gp120 bands precipitated by each

1140 antibody were normalized to those of the respective gp160 and gp120 bands

1141 precipitated by the PGT121 antibody. The means and standard deviations of the results

1142 of two independent experiments are shown.

1143

1144 **FIG 2 Antigenicity profiles of HIV-1 Envs on purified cell membranes.** (A) A549

1145 cells were induced with doxycycline to express the wt HIV-1<sub>AD8</sub> Env or the 2-4 RM6 E

1146 Env. Cell membranes were purified as described in Materials and Methods and

1147 incubated with the indicated antibodies for 1 h at 4°C, with or without 10 μM BMS-806.

1148 The membranes were lysed with 1% NP-40 with or without BMS-806 for 5 minutes on

1149 ice, and then incubated with Protein A-Sepharose beads for 1 h at 4°C. The precipitated

1150 proteins were subjected to Western blotting with a goat anti-gp120 antiserum or the

1151 human 4E10 anti-gp41 antibody. (B) The intensities of the gp120 and gp160 bands in A

1152 were measured in Fiji Image J (NIH). The gp120 and gp160 band intensity for each

1153 antibody was normalized to those of the respective gp120 and gp160 bands of the  
1154 PGT121 samples. The means and standard deviations from two independent  
1155 experiments are shown.

1156

1157 **FIG 3 Properties of amphipathic copolymers for membrane protein solubilization.**

1158 The structures and properties of the SMA and DIBMA variants used in this study are  
1159 shown.

1160

1161 **FIG 4 Yield and antigenicity of the AE.2 Env solubilized in different amphipathic**

1162 **copolymers.** A549 cells were induced with doxycycline to express the AE.2 Env. Cell

1163 membranes were purified, crosslinked with 0.35 mM DTSSP and extracted with the

1164 indicated amphipathic copolymers. (A) Eluates from the Ni-NTA beads were analyzed

1165 by SDS-PAGE under non-reducing (-DTT) or reducing (+DTT) conditions, followed by

1166 silver staining. (B) A small panel of antibodies was used to assess the antigenicity of the

1167 AE.2 Env eluted from the Ni-NTA beads. The 2G12 bNAbs recognizes gp120 outer

1168 domain glycans in a manner that is relatively independent of Env conformation. The 19b

1169 pNAbs recognizes a gp120 V3 epitope. The PGT145, PG9 and VRC03 bNAbs exhibit

1170 some preference for the pretriggered (State-1) Env conformation. The AE.2 Env

1171 precipitated by the antibodies was captured on Protein A-Sepharose beads and

1172 subjected to Western blotting with a goat anti-gp120 antiserum. The results of a typical

1173 experiment are shown.

1174

1175 **FIG 5 Stability of Env solubilized in Cymal-5, SMA or RIPA at different**

1176 **temperatures.** To evaluate the integrity of the cleaved Env trimer under different

1177 solubilization conditions, we compared the relative efficiencies of gp120 and gp160  
1178 precipitation by Ni-NTA beads, which bind the His<sub>6</sub> tags at the carboxyl termini of the  
1179 Envs. (A) A549 cells were induced with doxycycline to express the wt HIV-1<sub>AD8</sub> and 2-4  
1180 RM6 E Envs, both of which have His<sub>6</sub> tags at the carboxyl terminus. Forty-eight hours  
1181 after induction, the cells were lysed in 1% Cymal-5, 1% SMA or RIPA buffer in the  
1182 absence or presence of 10 μM BMS-806 for 5 minutes on ice. After pelleting cell debris,  
1183 a sample of the supernatant was saved as “Input.” The remainder of the cleared  
1184 supernatants was incubated at the indicated times and temperatures with Ni-NTA beads  
1185 by end-over-end rotation. For Cymal-5, SMA and RIPA samples, the beads were  
1186 washed with 60 bed volumes of the corresponding wash buffers (20 mM Tris-HCl (pH  
1187 8.0), 100 mM (NH<sub>4</sub>)<sub>2</sub>SO<sub>4</sub>, 1 M NaCl, 30 mM imidazole, 1% Cymal-5); (20 mM Tris-HCl  
1188 (pH 8.0), 100 mM (NH<sub>4</sub>)<sub>2</sub>SO<sub>4</sub>, 1 M NaCl, 30 mM imidazole, 0.005% Cymal-6); or RIPA  
1189 buffer. After washing, the samples captured on the Ni-NTA beads were Western blotted  
1190 with a goat anti-gp120 antiserum (upper panels) or the human 4E10 anti-gp41 antibody  
1191 (lower panels). RT – room temperature. (B) Quantification of the gp120 and gp160  
1192 band intensity in A was performed in Fiji Image J (NIH). The stability of the Env trimer  
1193 was calculated by the formula  $(gp120/gp160)_{Ni-NTA} \div (gp120/gp160)_{Input}$ . The means  
1194 and standard deviations derived from two independent experiments are shown. The  
1195 data were compared with a Student’s t test. Two-tailed P values are shown, \*: P<0.05;  
1196 \*\*: P<0.01; \*\*\*: P<0.001.

1197

1198

1199 **FIG 6 Oligomeric composition of the 2-4 RM6 E Env in Cymal-5 and SMA at room**  
1200 **temperature.** Membranes were prepared from A549 cells induced with doxycycline to  
1201 express the 2-4 RM6 E Env. The 2-4 RM6 E Env was extracted at room temperature  
1202 with 1% SMA or 1% Cymal-5. The extracted Envs were purified on Ni-NTA beads at  
1203 room temperature and analyzed by SDS-PAGE (A) or Blue Native-PAGE (B), followed  
1204 by silver staining. Note that BMS-806 treatment shifts the Env trimer population to a  
1205 form that migrates faster on Blue Native gels.

1206

1207 **FIG 7 Antigenicity of the 2-4 RM6 E Env after Ni-NTA purification from cell**  
1208 **lysates.** (A) A549 cells were induced with doxycycline to express the 2-4 RM6 E Env.  
1209 Forty-eight hours later, the cells were lysed with either 1% Cymal-5 or 1% SMA in the  
1210 absence or presence of 10  $\mu$ M BMS-806. The 2-4 RM6 E Env was partially purified by  
1211 Ni-NTA affinity chromatography, aliquoted and incubated with the indicated antibodies  
1212 together with Protein A-Sepharose beads for 1 h at 4°C. An aliquot without added  
1213 antibody served as the Input sample. The Input sample and precipitated proteins were  
1214 Western blotted with a goat anti-gp20 antiserum (upper panels) and the human 4E10  
1215 anti-gp41 antibody (lower panels). The asterisk marks the position of the heavy chains  
1216 of the antibodies used for precipitation. (B) Quantification of the intensity of the gp120  
1217 and gp160 bands in A was performed in Fiji Image J (NIH). The intensities of the gp120  
1218 and gp160 bands were normalized to those of the respective gp120 and gp160 bands  
1219 precipitated by the PGT121 antibody. The means and standard deviations derived from  
1220 two independent experiments are shown.

1221

1222 **FIG 8 Comparison of the 2-4 RM6 E Env conformation in Cymal-5 and SMA.** The  
1223 correlation is shown between the antigenicities of the Cymal-5-solubilized and SMA-  
1224 solubilized cleaved 2-4 RM6 E Envs in the absence (A,B) or presence (C) of 10  $\mu$ M  
1225 BMS-806. The pNAbs are designated in red and the bNAbs in blue. The Spearman rank  
1226 correlation coefficient ( $r_s$ ), the Pearson  $r$  ( $r_P$ ) and two-tailed P values are shown. In A,  
1227 note the outlier values for the two bNAbs (4E10 and 10E8) directed against the gp41  
1228 MPER (highlighted by the box). In B, the correlation is shown for the antibodies other  
1229 than the MPER-directed 4E10 and 10E8 anti-gp41 antibodies.

1230

1231 **FIG 9 Effect of crosslinking on the antigenicity of 2-4 RM6 E Env-SMALPs**  
1232 **prepared from purified membranes.** (A) A549 cells were induced with doxycycline to  
1233 express the 2-4 RM6 E Env. Cell membranes were purified and divided into two parts,  
1234 one treated with 0.35 mM DTSSP crosslinker at room temperature for 45 minutes and  
1235 the other mock-treated. DTSSP crosslinks are able to be reduced, allowing crosslinked  
1236 gp120 and gp41 subunits to be distinguished from uncleaved gp160 on Western blots.  
1237 The membranes were lysed in 1% SMA in the presence of 10  $\mu$ M BMS-806 for 30  
1238 minutes at room temperature. The 2-4 RM6 E Env was purified by Ni-NTA affinity  
1239 chromatography, aliquoted and incubated with the indicated antibodies together with  
1240 Protein A-Sepharose beads for 1 h at 4°C. The precipitated proteins were analyzed on  
1241 reducing SDS-polyacrylamide gels and Western blotted with a goat anti-gp120  
1242 antiserum (upper panels) and the human 4E10 anti-gp41 antibody (lower panels). The  
1243 asterisk indicates the position of the heavy chain of the precipitating antibodies. (B)  
1244 Quantification of gp120 and gp160 band intensity in A was performed in Fiji Image J

1245 (NIH). The intensities of the gp120 and gp160 bands were normalized to those of the  
1246 respective bands precipitated by the PGT121 antibody. The means and standard  
1247 deviations derived from two independent experiments are shown.

1248

1249 **FIG 10 Antigenicity of Env purified using multiple measures to preserve Env**

1250 **conformation.** (A) Cell membranes were purified from A549 cells induced with  
1251 doxycycline to express the 2-4 RM6 E Env. The purified membranes were crosslinked  
1252 with 0.35 mM DTSSP in the presence of 10  $\mu$ M BMS-806 at room temperature for 45  
1253 minutes. The membranes were lysed in 1% SMA in the presence of 10  $\mu$ M BMS-806 for  
1254 30 minutes at room temperature. The 2-4 RM6 E Env was purified from the membrane  
1255 lysates by Ni-NTA affinity chromatography. In A, a fraction of the purified Env was  
1256 saved as Input and the rest was used to evaluate the binding of the indicated  
1257 antibodies, as described in the Figure 8 legend. In B, the purified Env was incubated  
1258 with 40  $\mu$ g/ml each of the 19b and F240 pNAbs together with Protein A-Sepharose  
1259 beads for 30 minutes at room temperature. After 19b/F240 counterselection, the flow-  
1260 through sample was aliquoted, with one fraction serving as the Input sample and the  
1261 rest used to evaluate antigenicity, as described in the Figure 8 legend. The bar graph  
1262 shows the relative binding to gp120 and gp160 normalized to the respective bands for  
1263 the PGT121 antibody. The means and standard deviations from two experiments are  
1264 reported.

1265

1266 **FIG 11 A model for the effect of extraction from membranes on HIV-1 Env**

1267 **conformation.** The cleaved membrane Env of primary HIV-1 mainly occupies a  
1268 pretriggered (State-1) conformation. Upon solubilization of the membrane proteins by

1269 SMA or Cymal-5 at 4°C, the extracted Envs assume conformations (States  $X_S$  and  $X_C$ ,  
1270 respectively) that differ from State 1. The conformations of the Envs in SMALPs and  
1271 Cymal-5 resemble one another, with differences mainly confined to the membrane-  
1272 proximal Env elements. The resemblance of the Envs solubilized by distinct approaches  
1273 supports the existence of a default Env conformation that is assumed when State 1 is  
1274 destabilized by the loss of the membrane. BMS-806 can bring the solubilized Envs  
1275 closer to a State-1 conformation, but BMS-806-treated, solubilized Envs still differ from  
1276 State 1. When the temperature is raised to room temperature, Envs in SMALPs are  
1277 more stable than Envs in detergents like Cymal-5.

**Figure 1****A** Cell-surface 2-4 RM6 E Env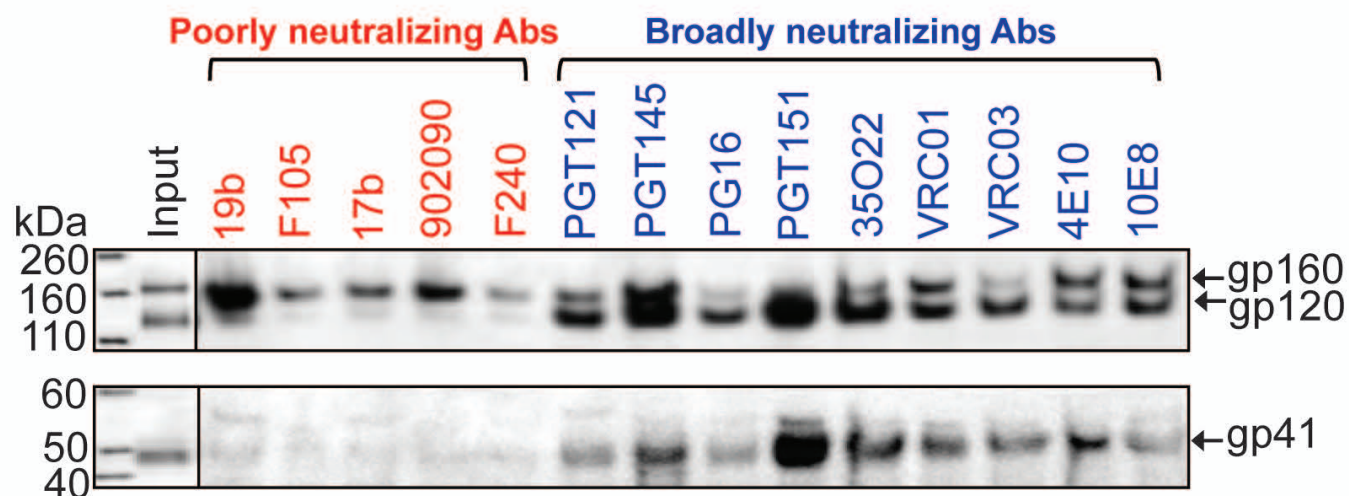**B**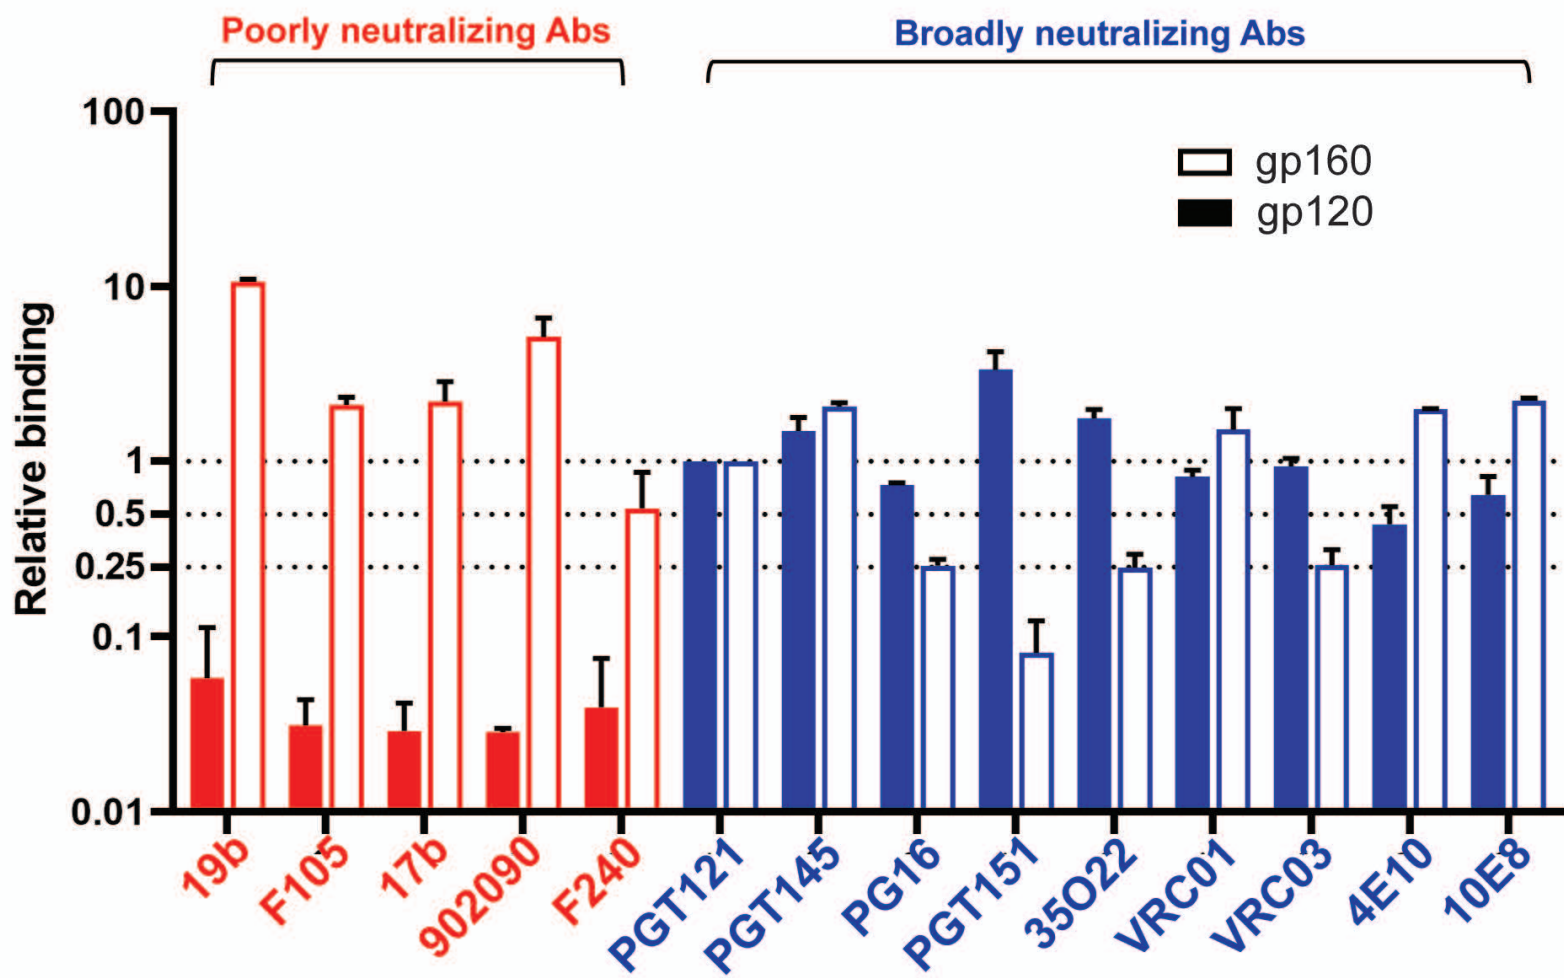



## A Cell-membrane Env

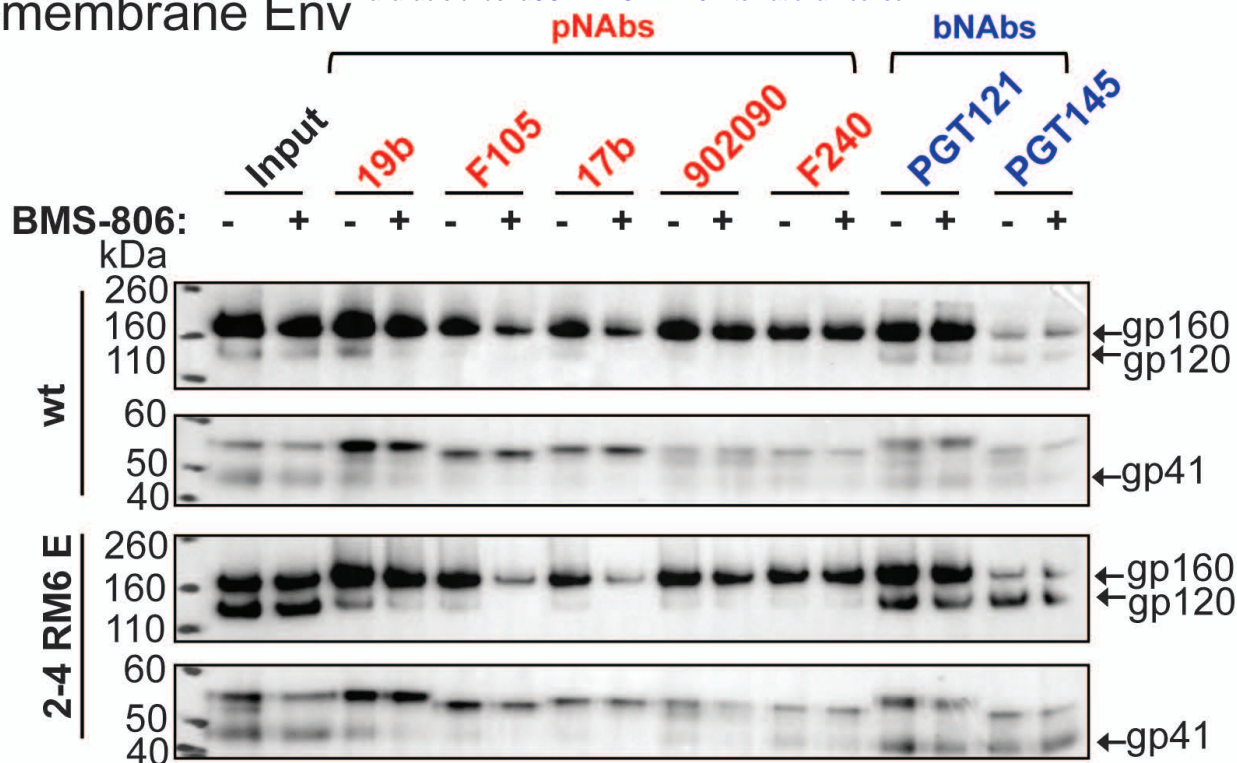

## B

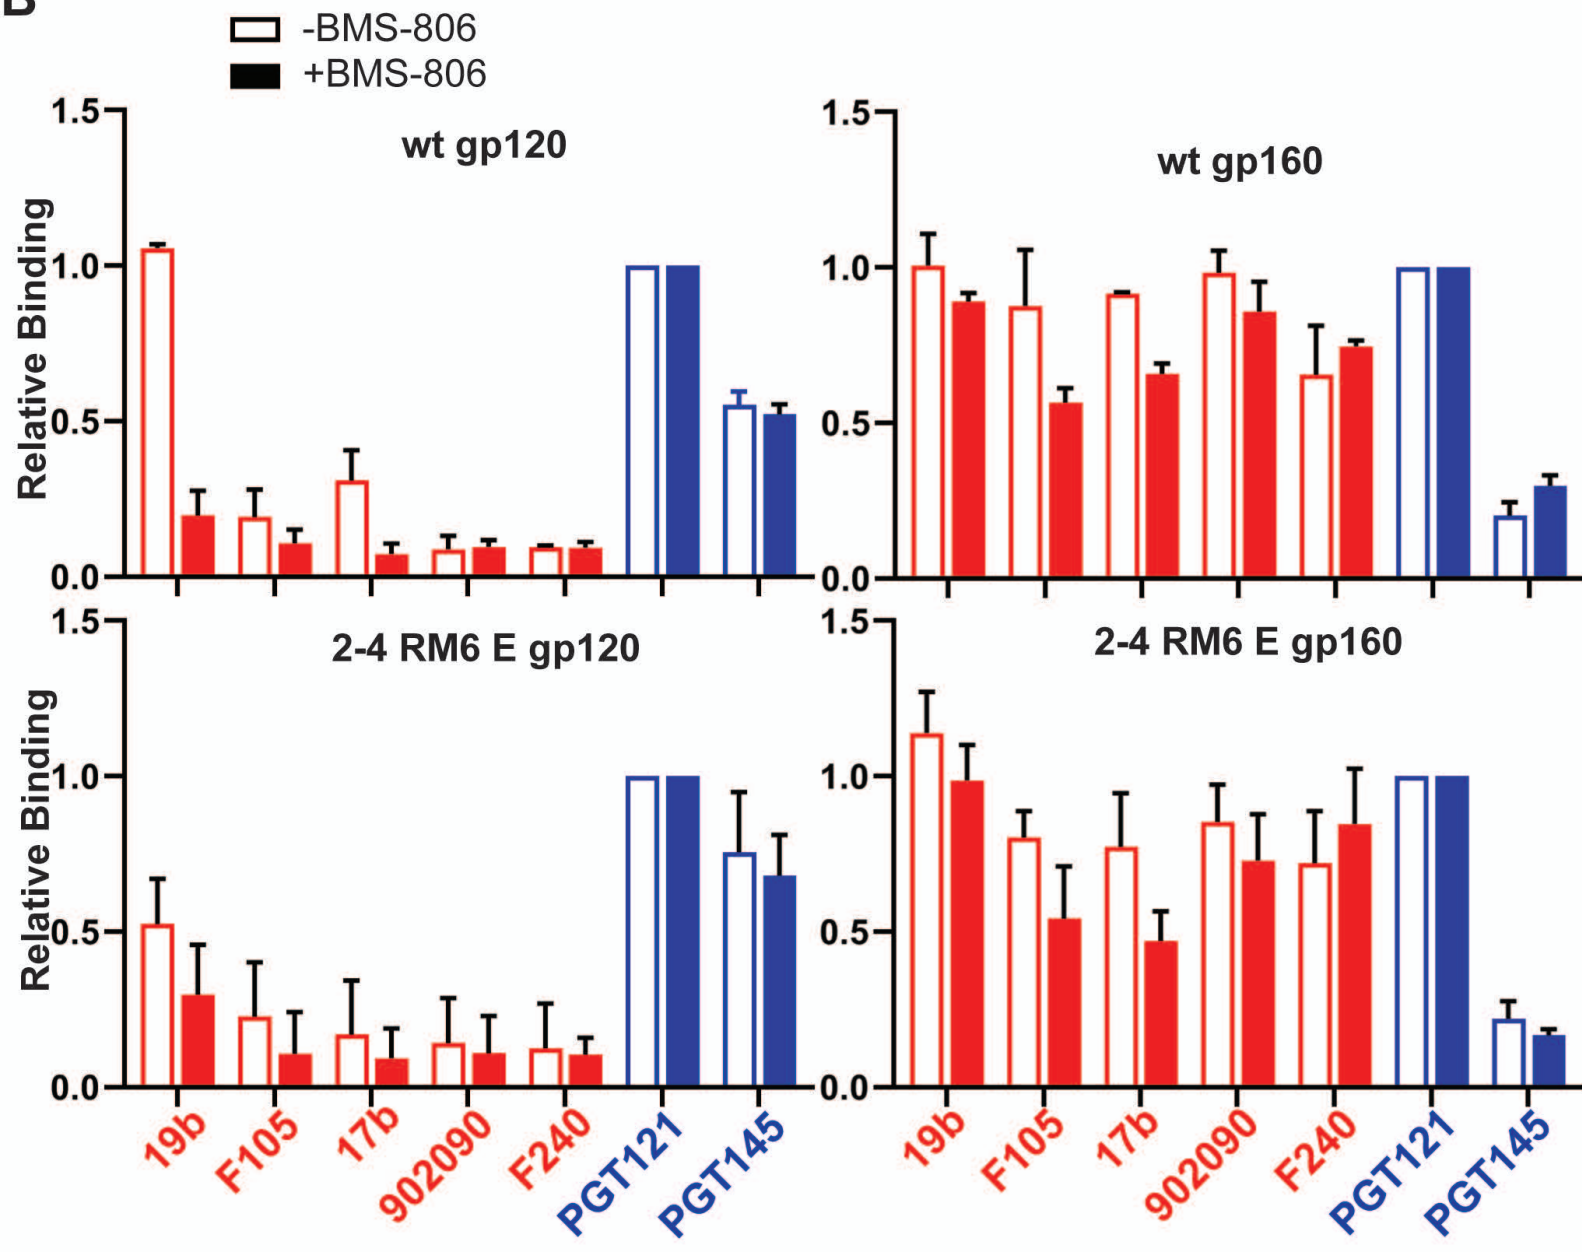

# Figure 3

bioRxiv preprint doi: <https://doi.org/10.1101/2023.03.01.530731>; this version posted March 3, 2023. The copyright holder for this preprint (which was not certified by peer review) is the author/funder, who has granted bioRxiv a license to display the preprint in perpetuity. It is made available under aCC-BY-NC-ND 4.0 International license.

|                   | Styrene: Maleic Acid ratio | Molecular Weight (kDa) | pH  | Divalent Ion Tolerance |
|-------------------|----------------------------|------------------------|-----|------------------------|
| DIBMA 10          |                            | 10                     | 7.5 | <25 mM                 |
| DIBMA 12          |                            | 12                     |     | <25 mM                 |
| DIBMA Glycerol    |                            | 10                     |     | >50 mM                 |
| DIBMA Glucosamine |                            | 10                     |     | >50 mM                 |
| SMALP 1100I       | 1.4:1                      | 5                      |     | <100 mM                |
| SMALP 25010       | 3:1                        | 10                     |     | <5 mM                  |
| SMALP 30010       | 2.3:1                      | 6.5                    |     | <5 mM                  |
| SMALP 40005       | 1.4:1                      | 5                      |     | <5 mM                  |
| In-house SMA      | 2:1                        |                        |     |                        |

**DIBMA 10 or DIBMA 12**

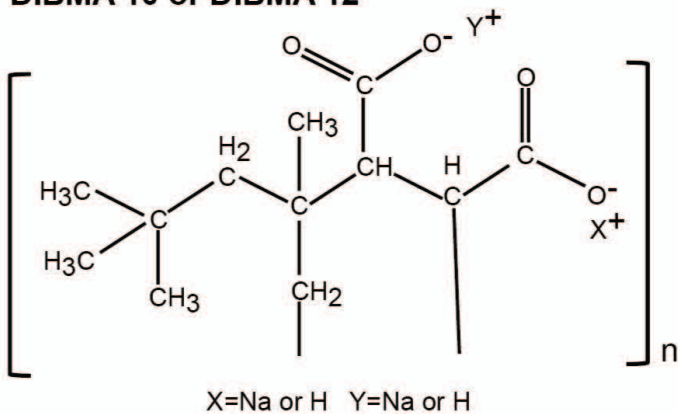

**DIBMA Glycerol**

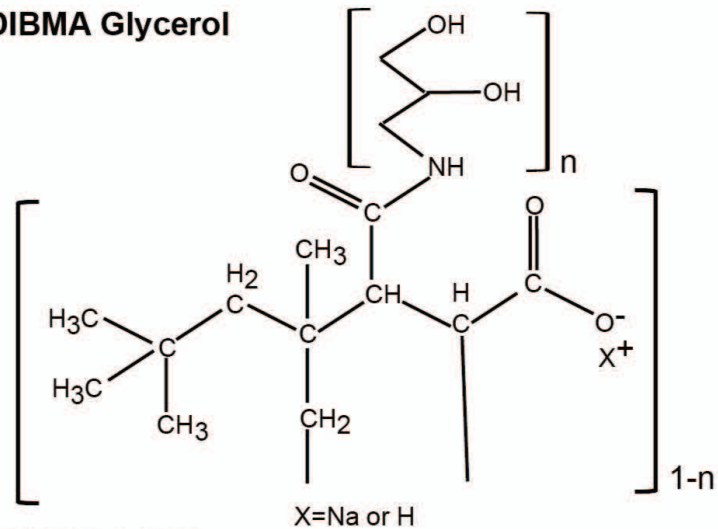

**DIBMA Glucosamine**

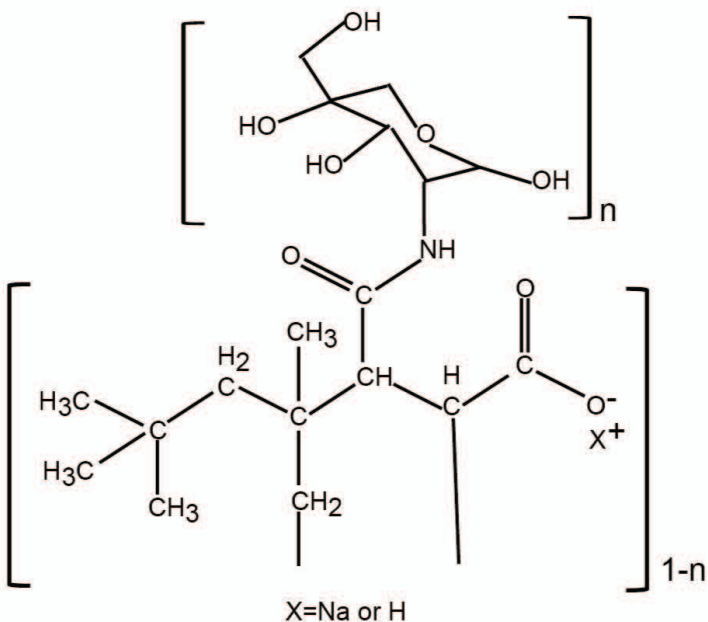

**SMALP 1100I**

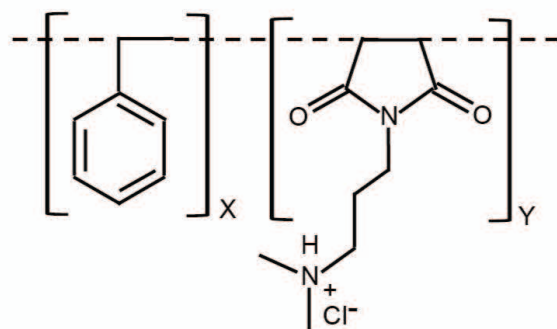

**SMALP 25010/30010/40005 or In-house SMA**

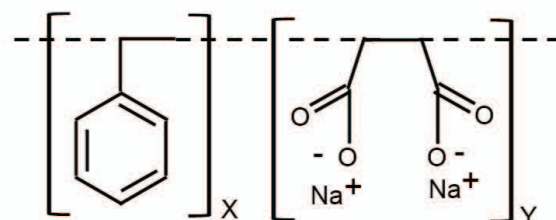

**Figure 4**

**A**

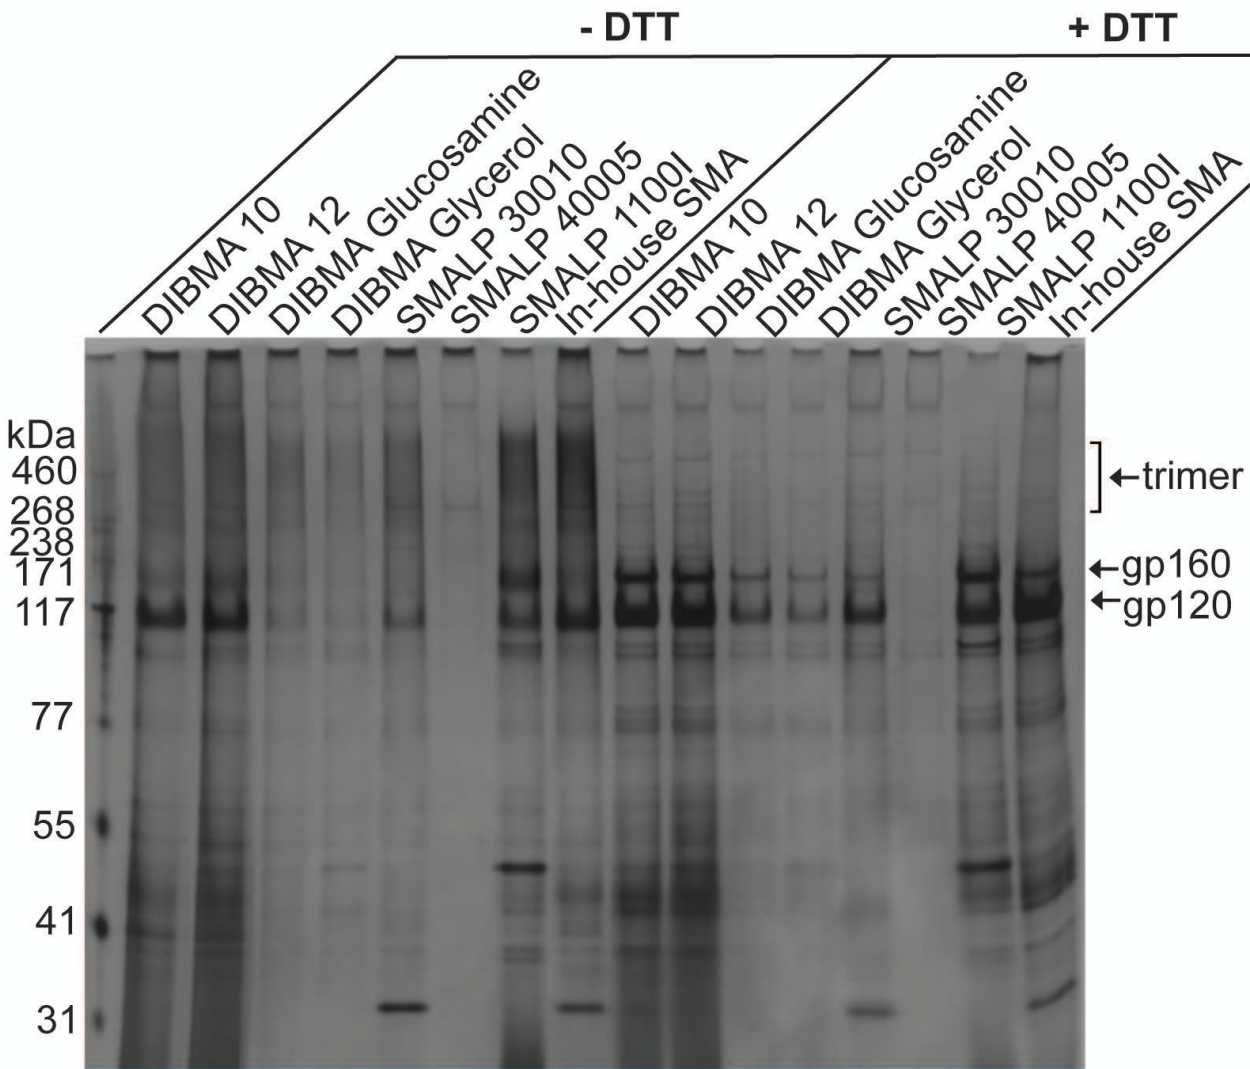

**B**

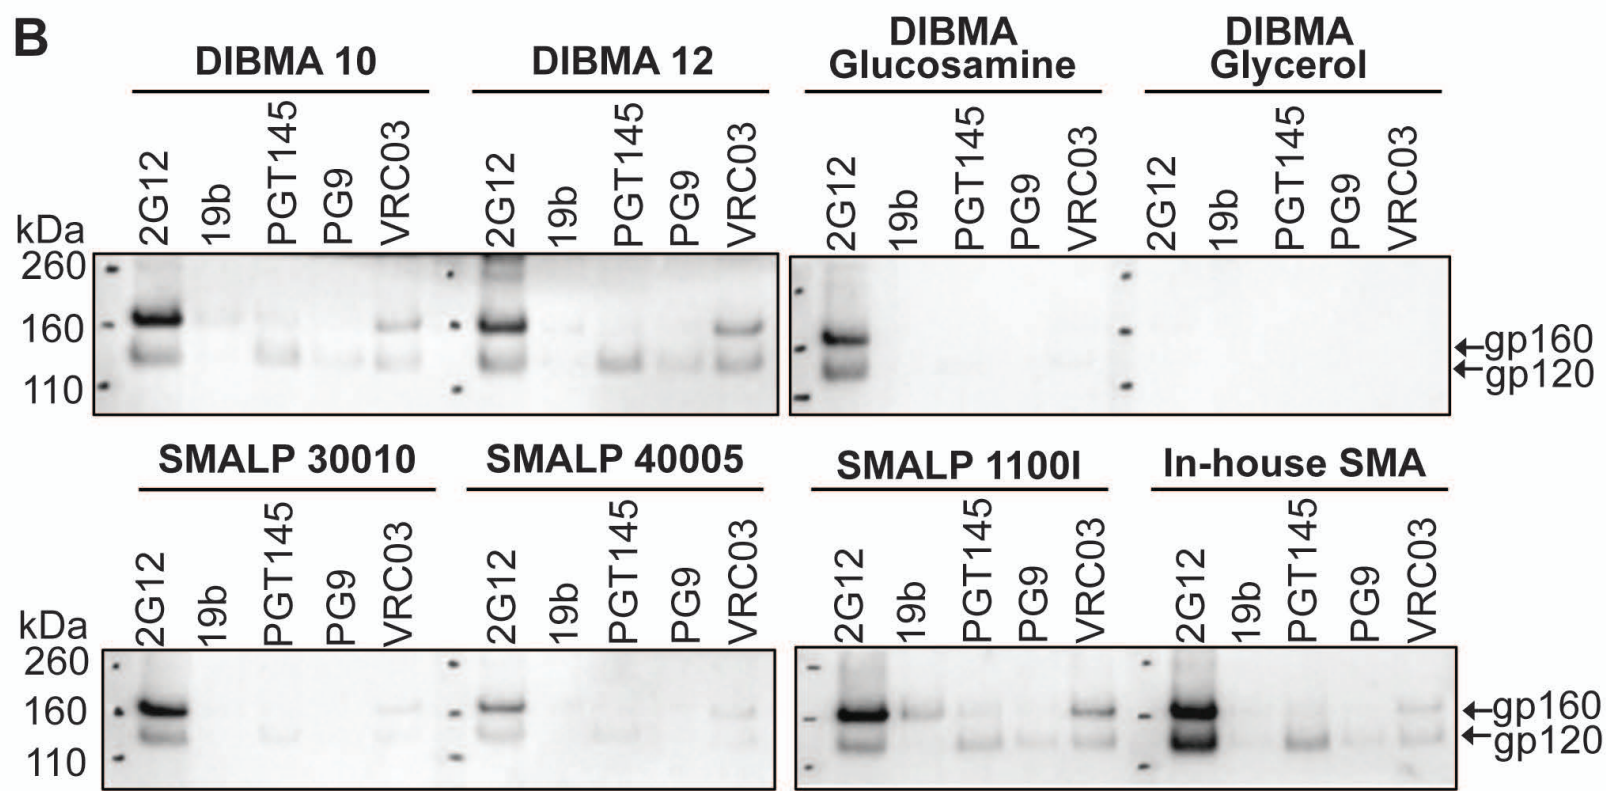

**A**

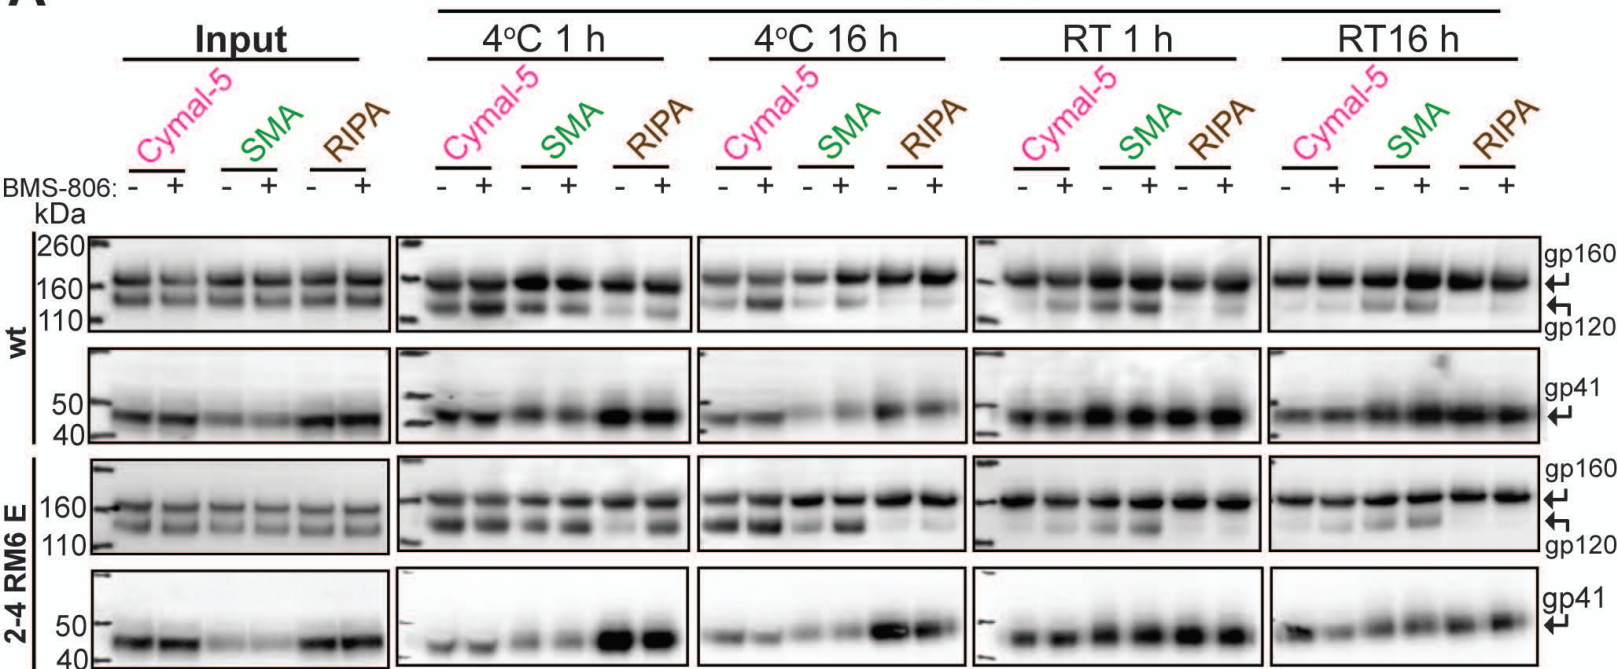

**B**

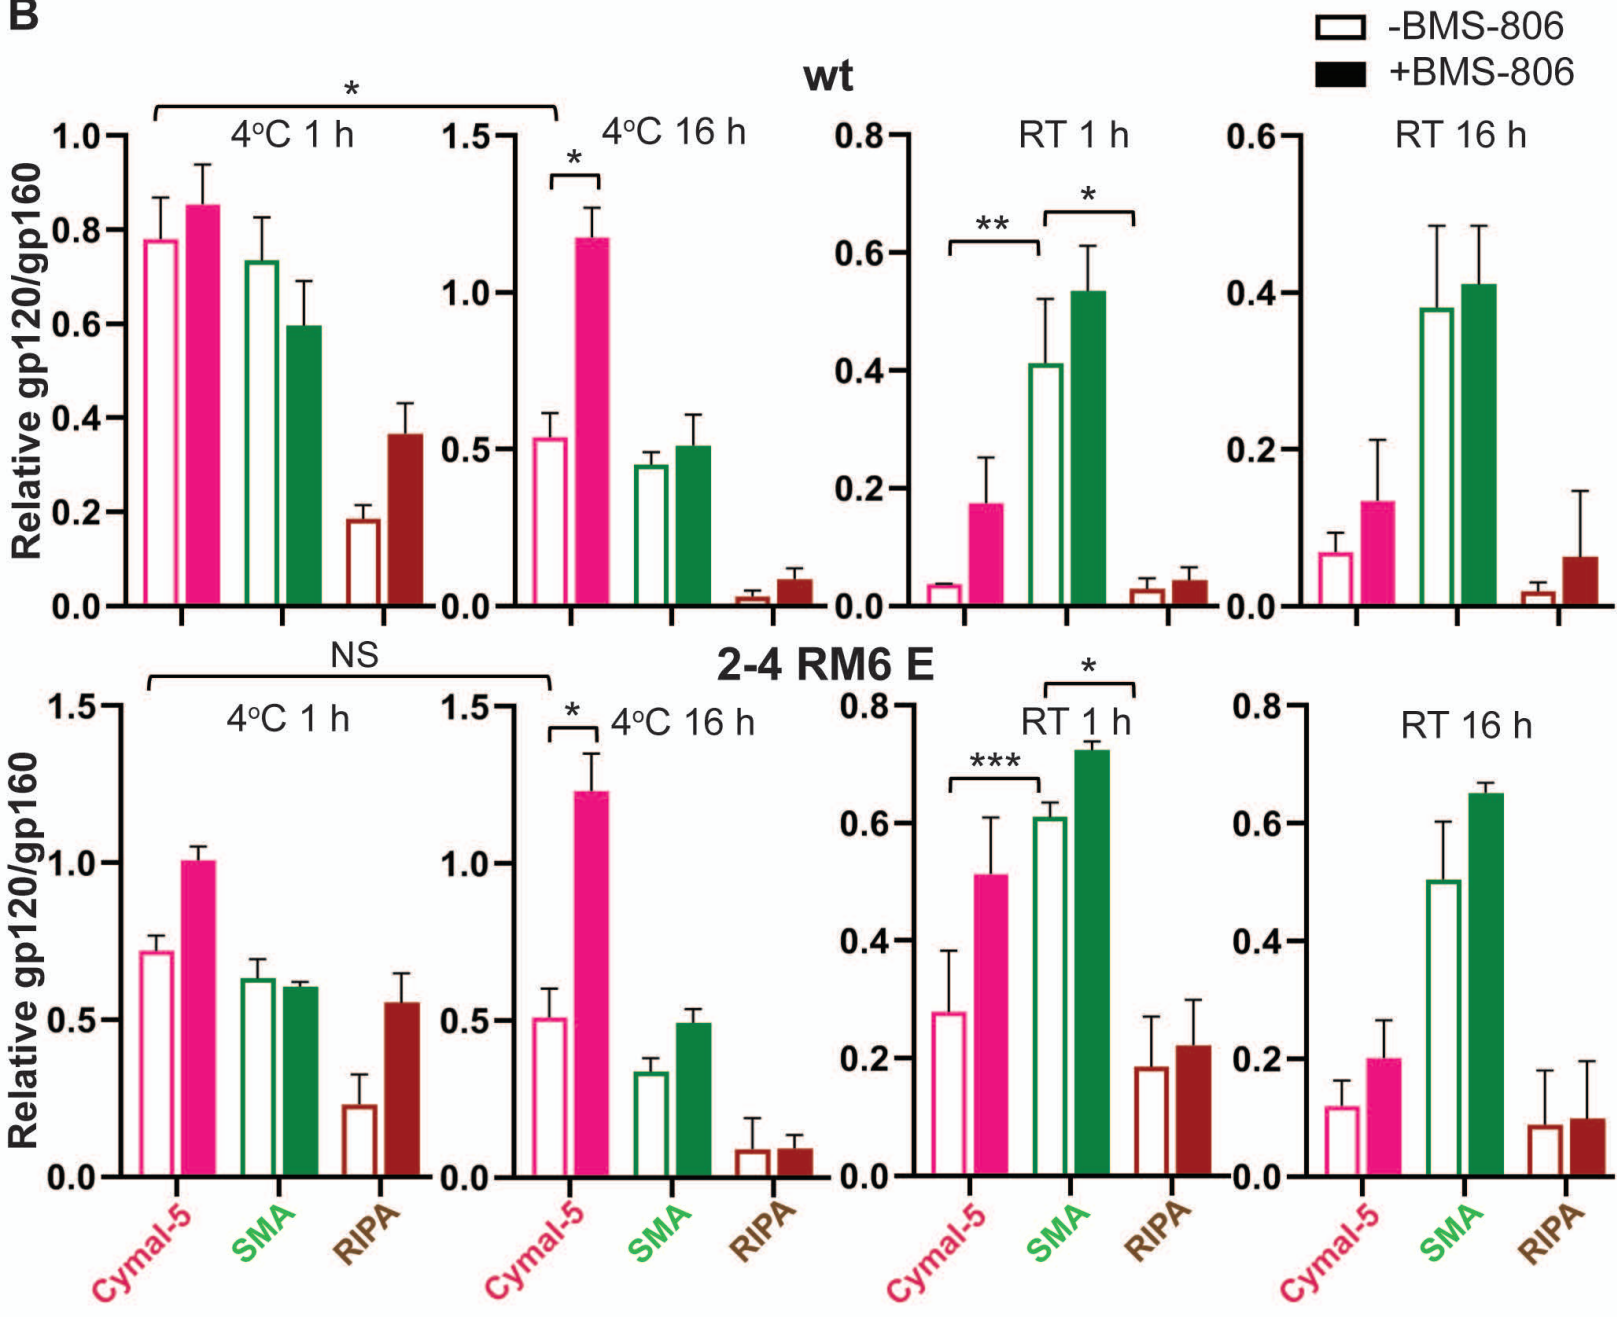

# Figure 6

## A SDS-PAGE

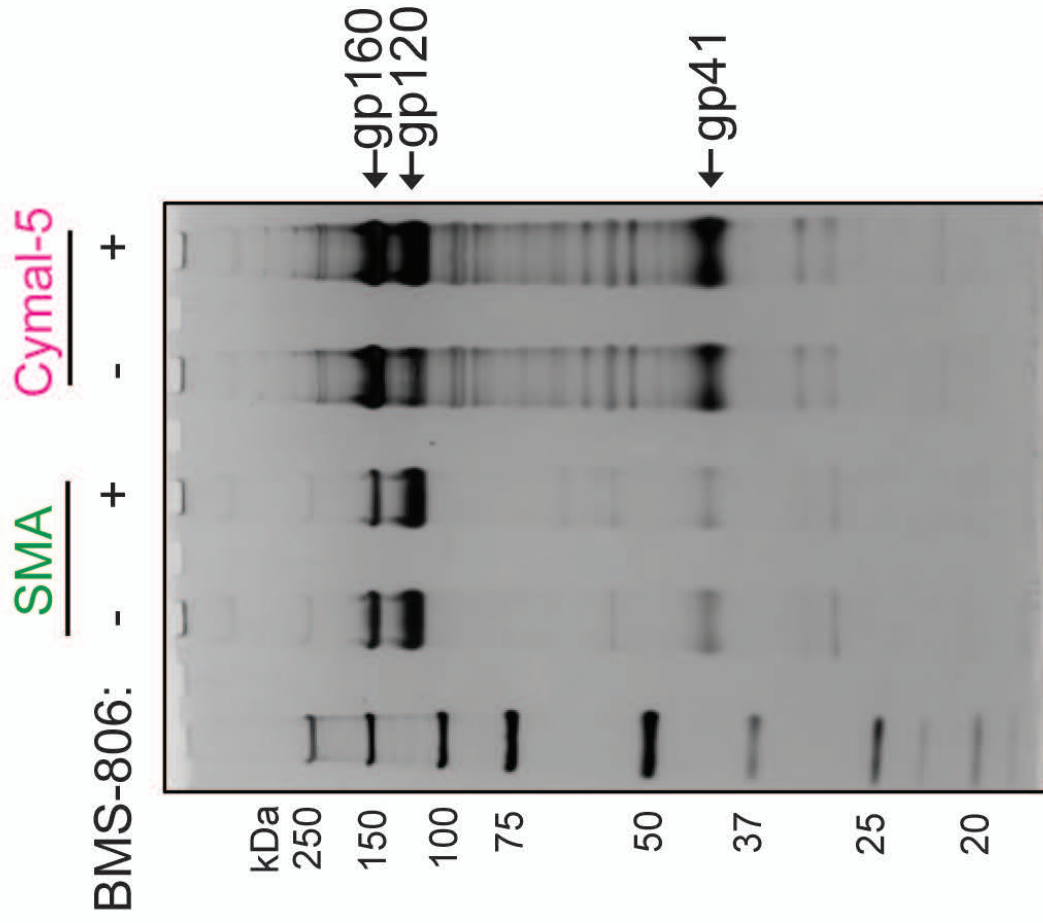

## B Blue Native-PAGE

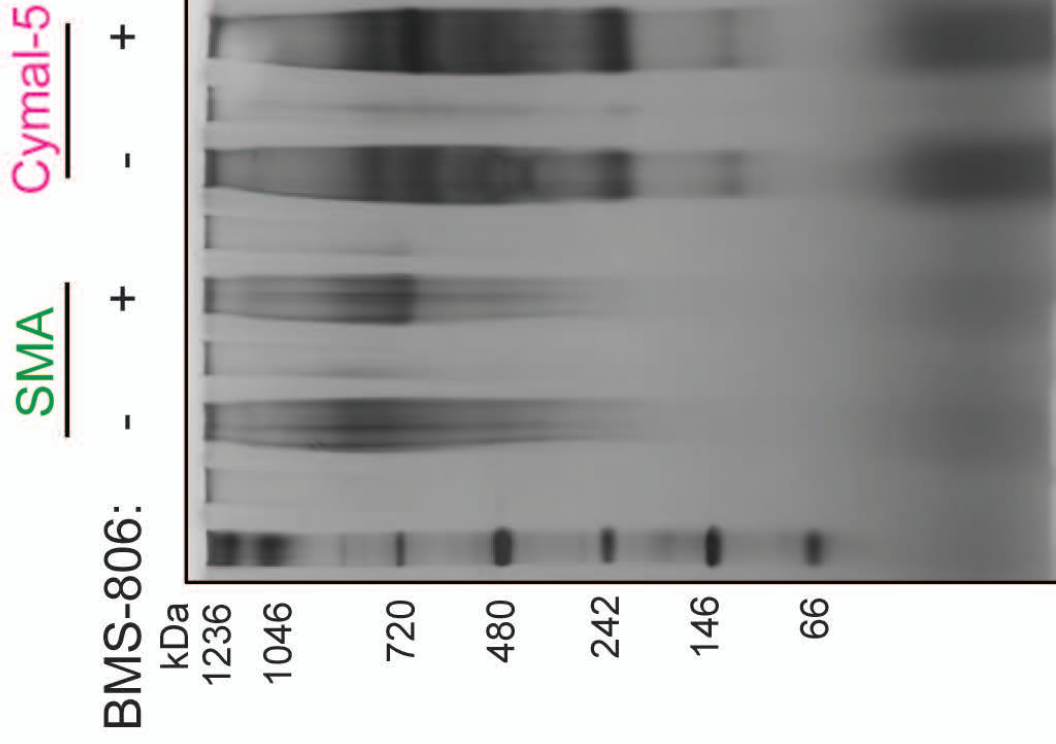

# Figure 7

**A**

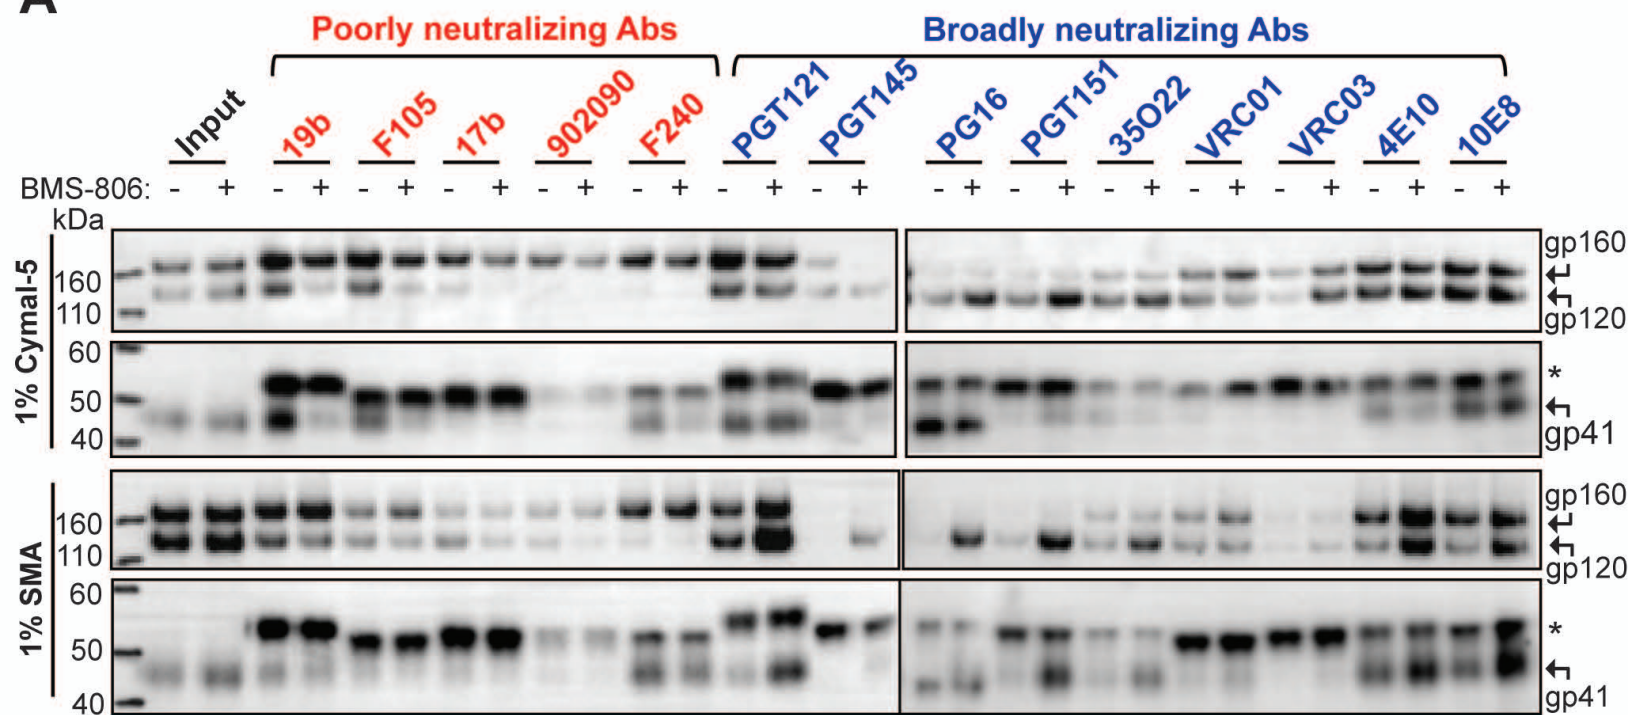

**B**

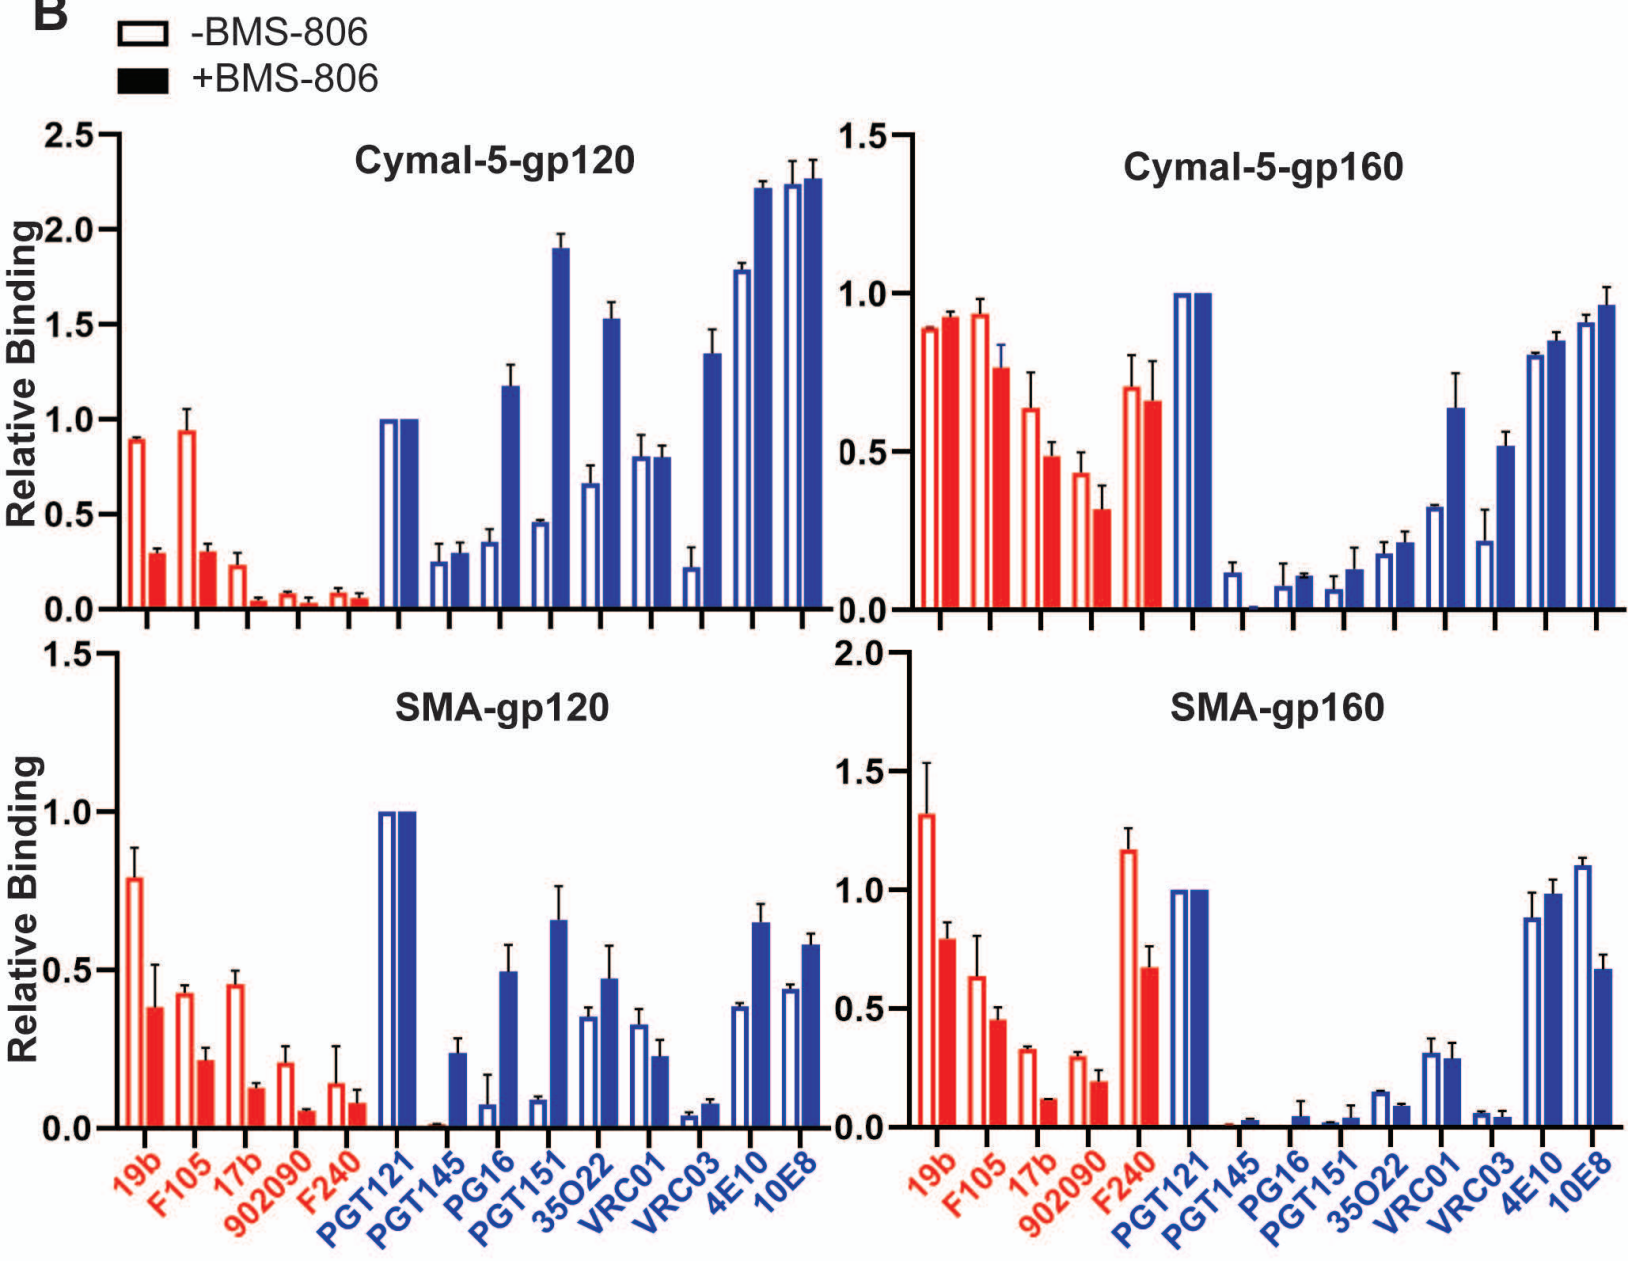

A

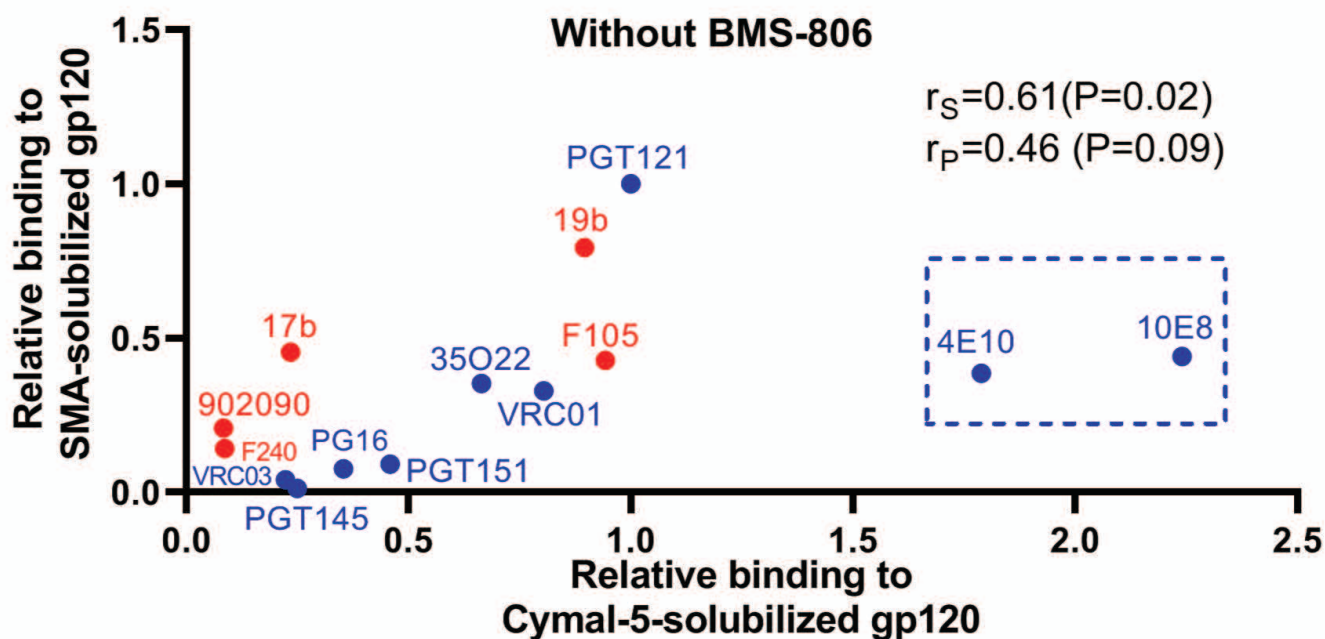

B

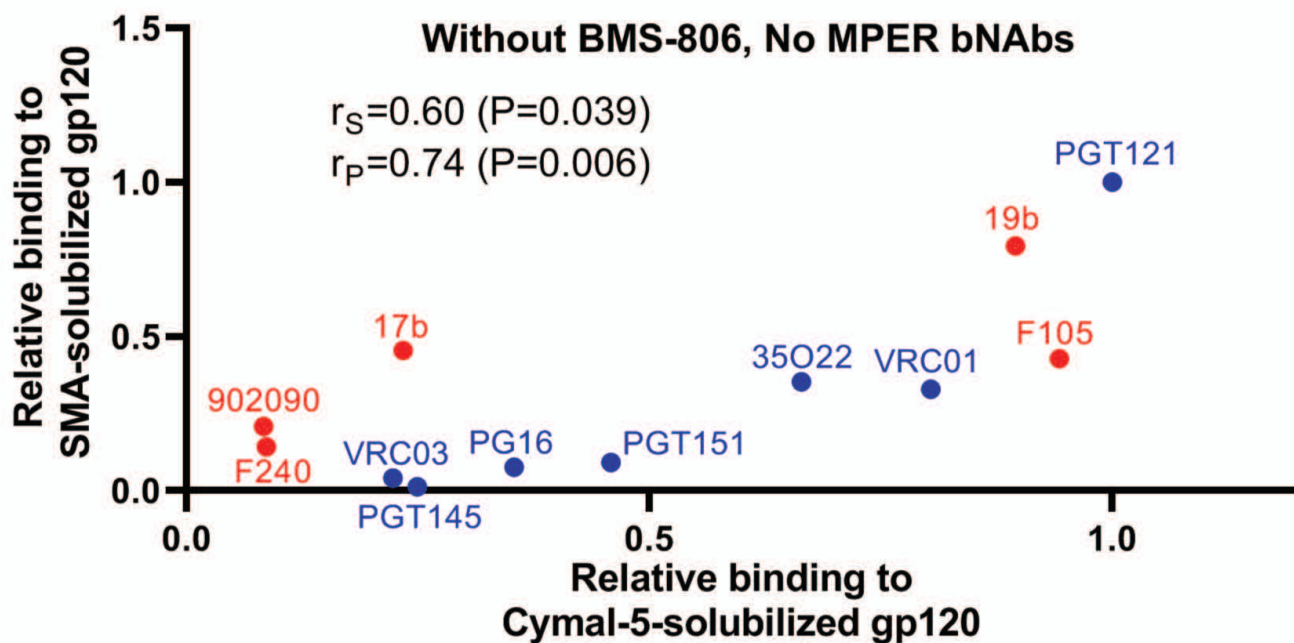

C

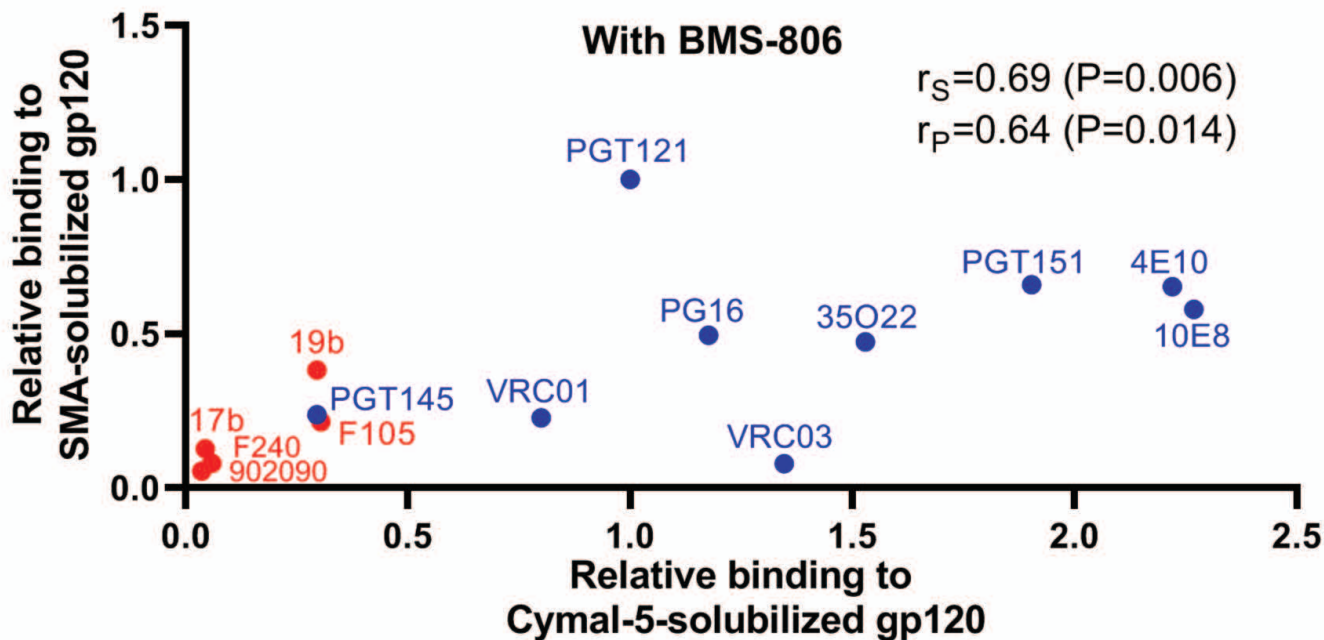

**Figure 9****A**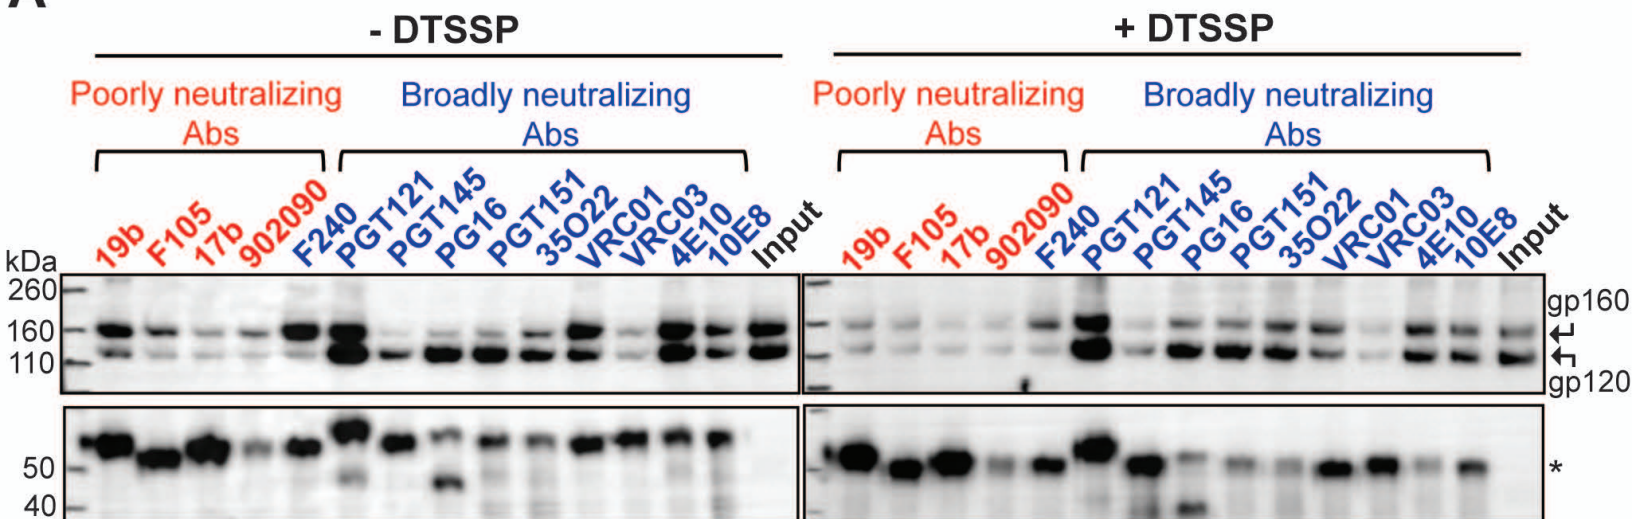**B**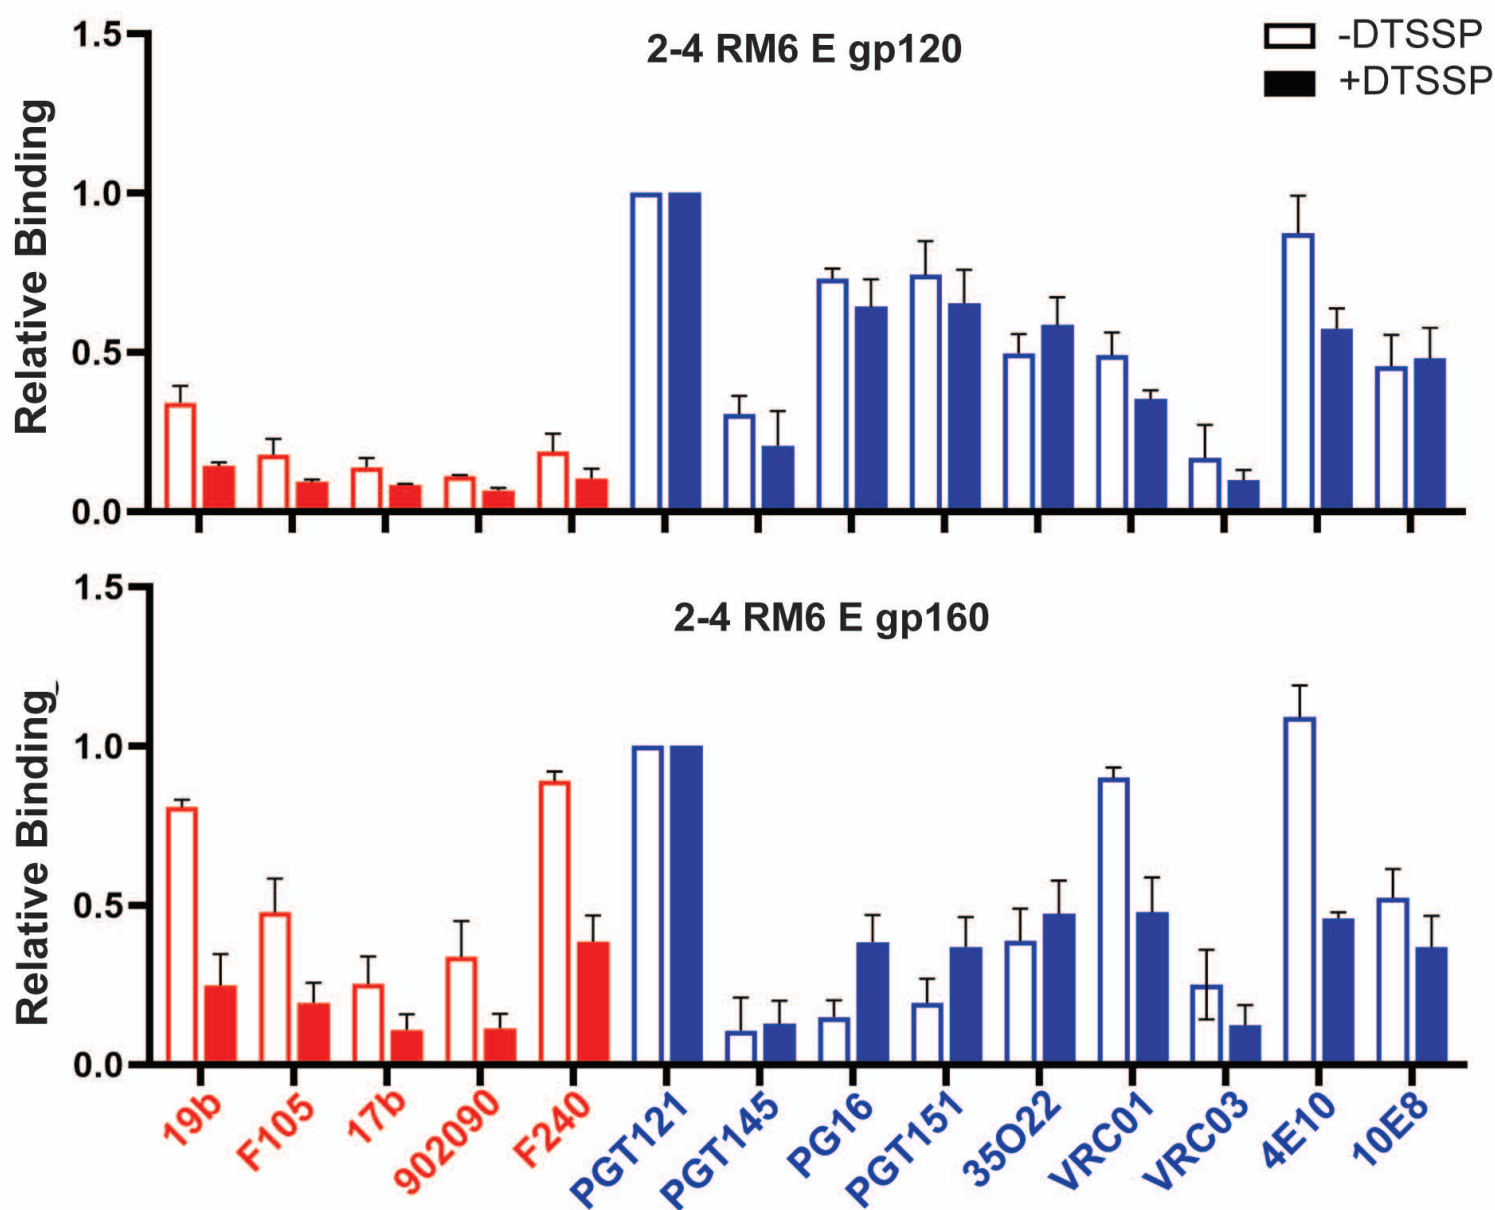



**Figure 10****A No counterselection**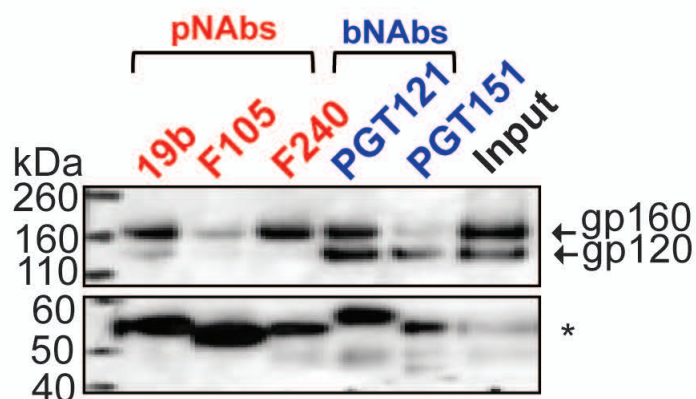**B With 19b/F240 counterselection**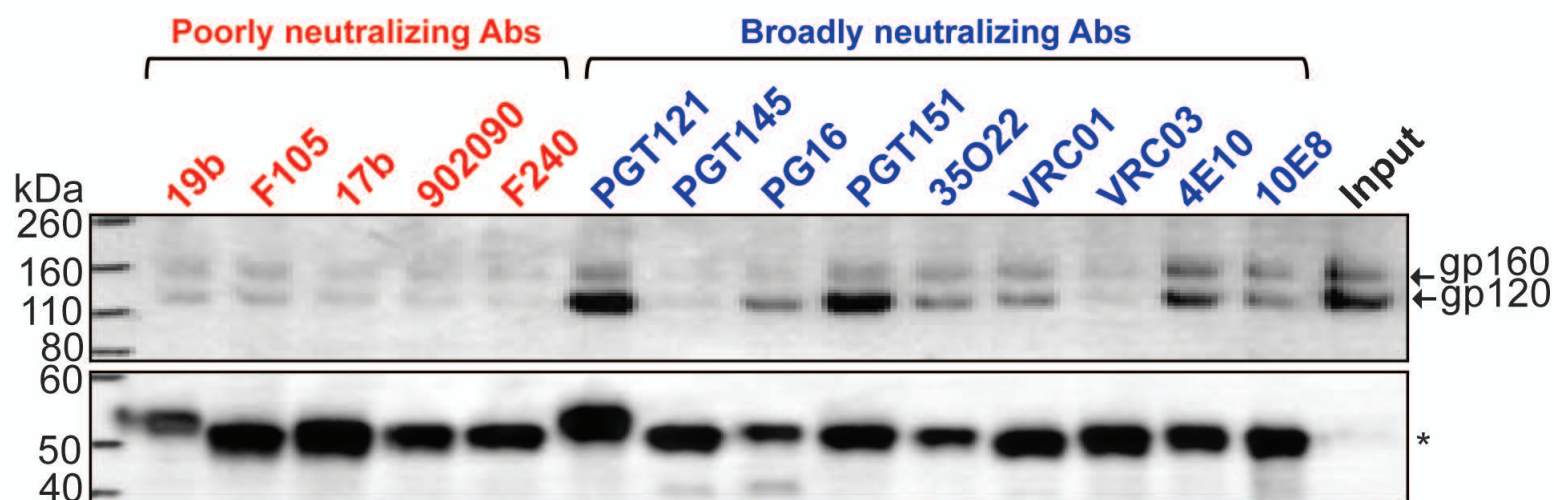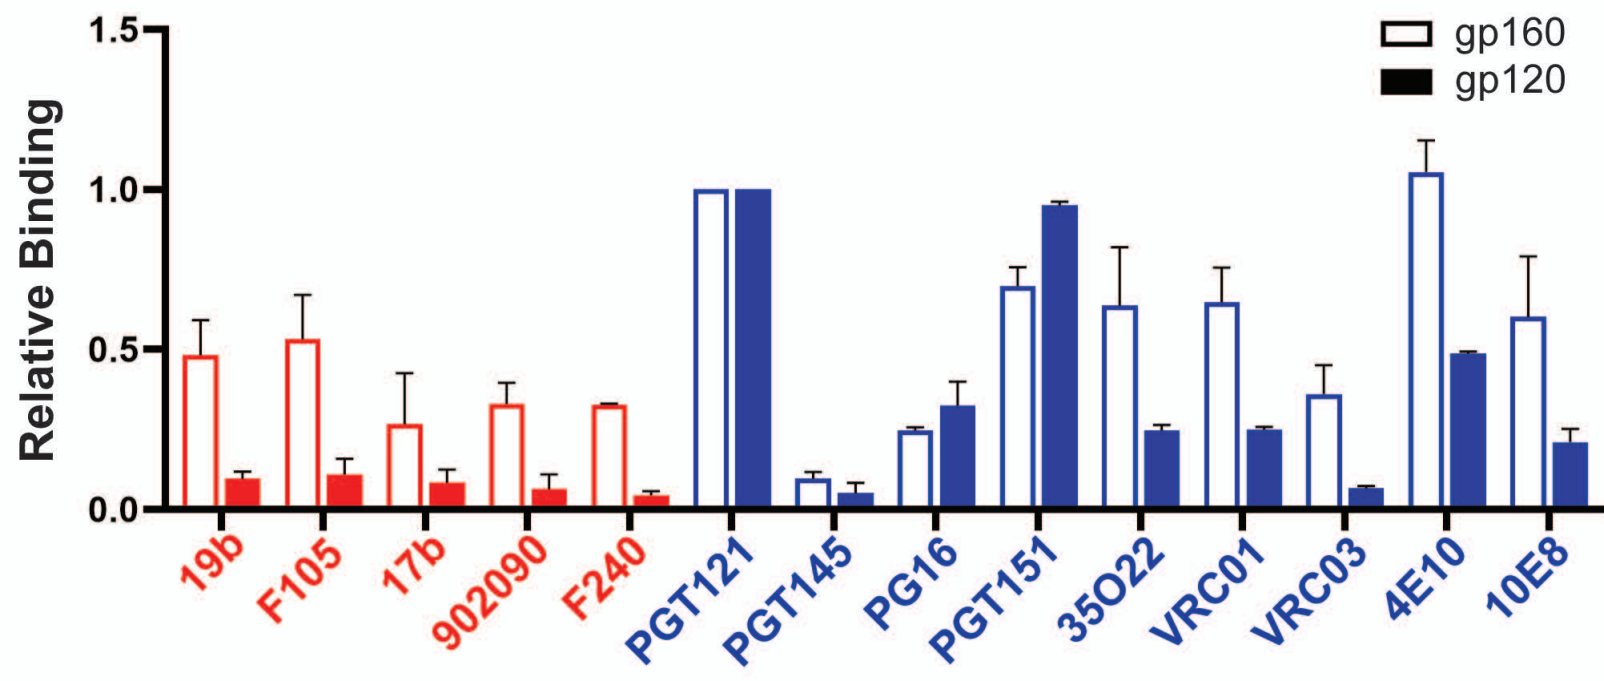

Figure 11

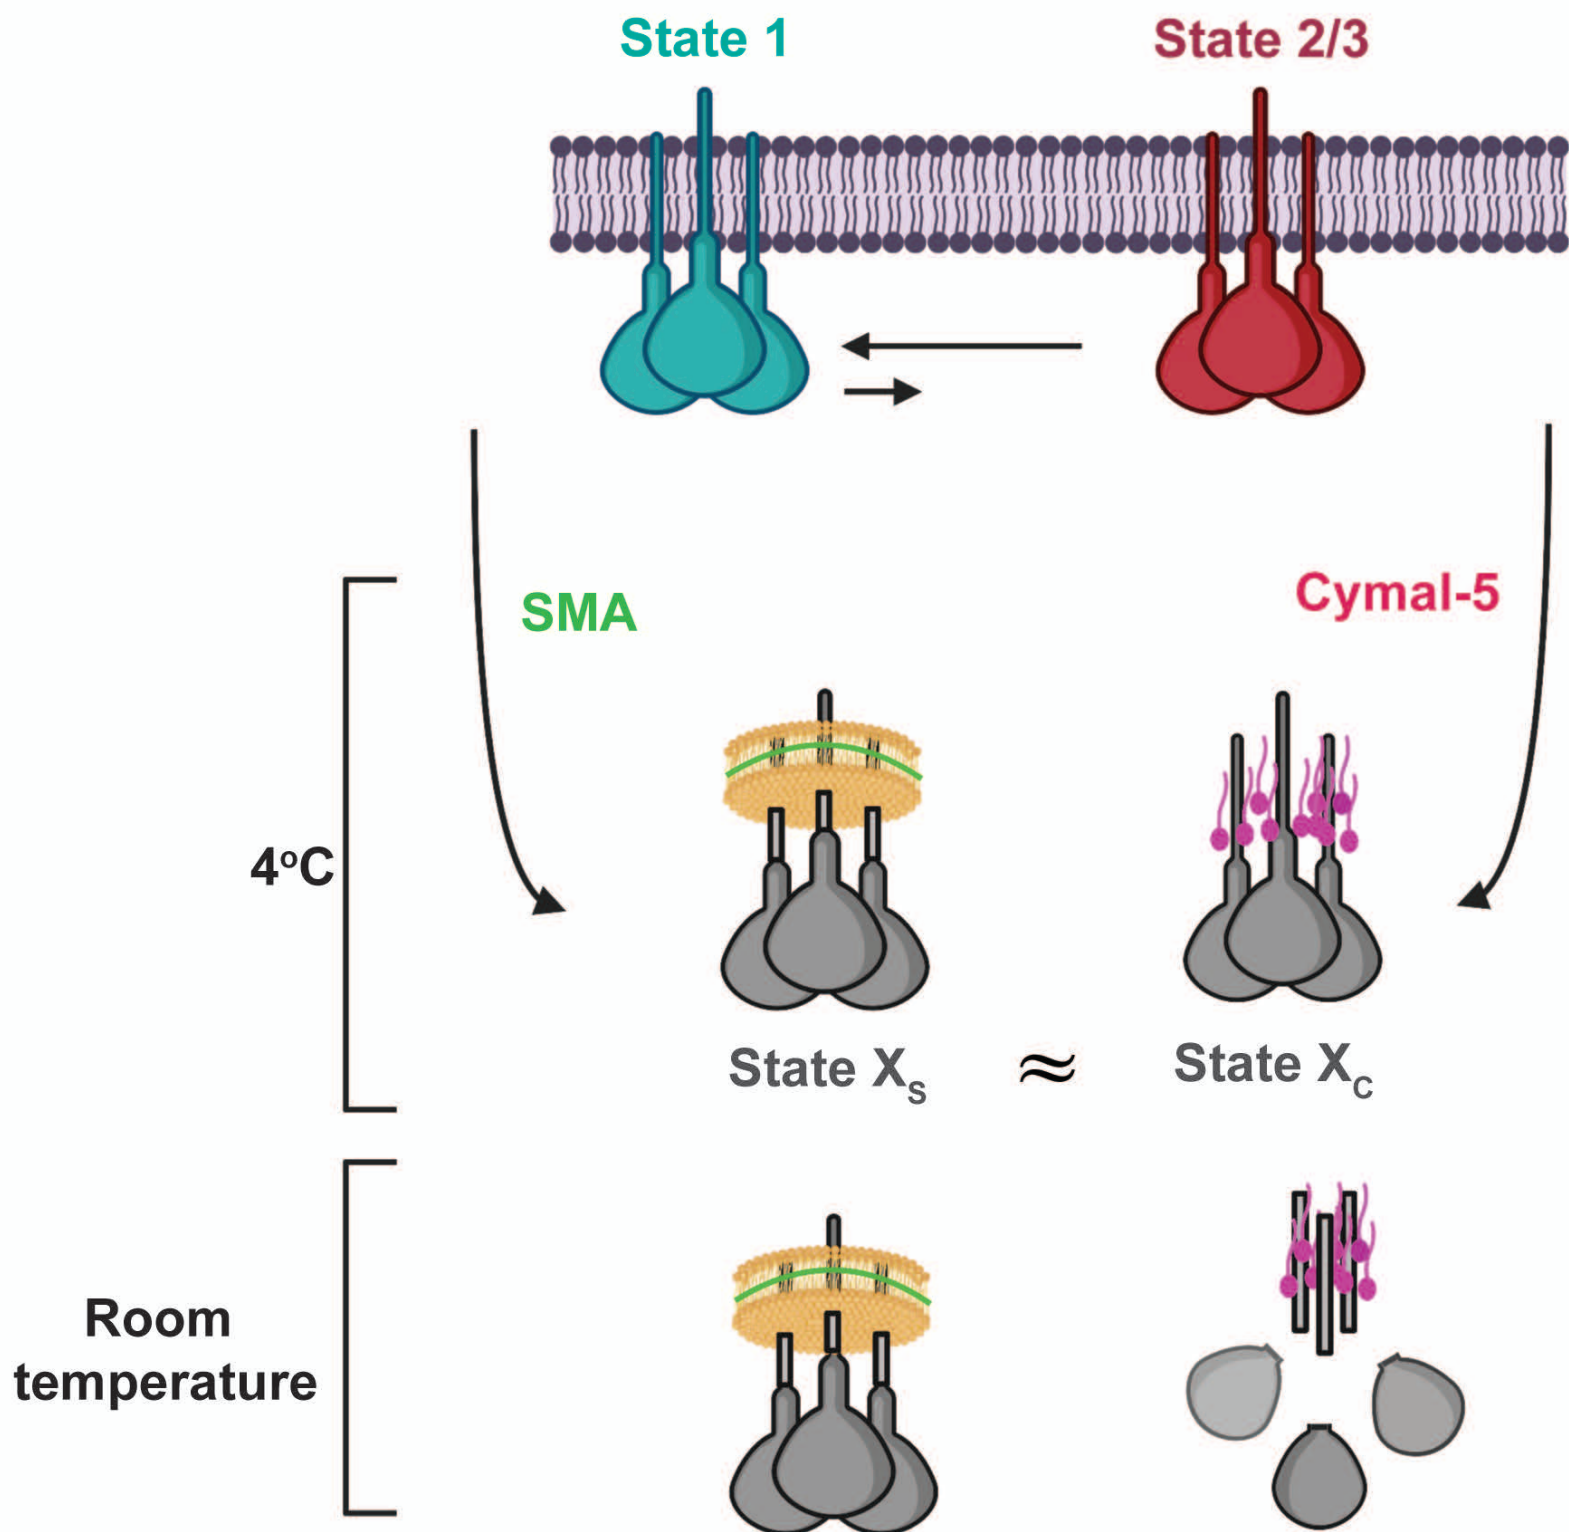

Source: https://www.biorxiv.org/content/10.1101/2023.03.01.530731v1.full.pdf
